# Supplementary material for: Herpesvirus Screening in Childhood Hematopoietic Transplant Reveals High Systemic Inflammation in Episodes of Multiple Viral Detection and an EBV Association with Elevated IL-1β, IL-8 and Graft-Versus-Host Disease
Source: MDPI journal article supplement (doi:10.3390/microorganisms10081685), 2022-08-22
Supplement: s1 [file s1]

**Supplementary Figure S1.** Kinetics of infections in childhood allogeneic and autologous hematopoietic stem cell transplant (HSCT). The follow up is shown in the X axis and the viral load in the Y axis. Each virus is represented with a specific color. Viral loads are expressed as DNA copies/ ug DNA in leukocytes or ml plasma.

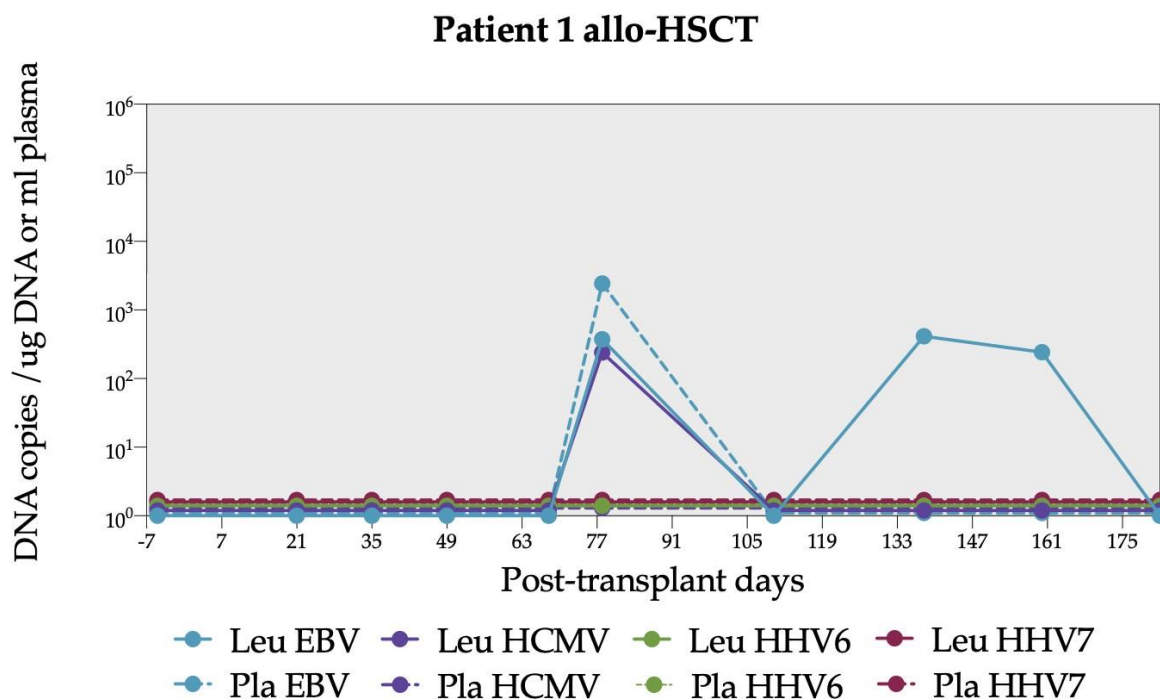

(a). Kinetics of infections in patient 1 who received allogeneic hematopoietic stem cell transplant (HSCT). The follow up is shown in the X axis and the viral load in the Y axis. Each virus is represented with a specific color. Viral loads are expressed as DNA copies/ ug DNA in leukocytes or ml plasma.

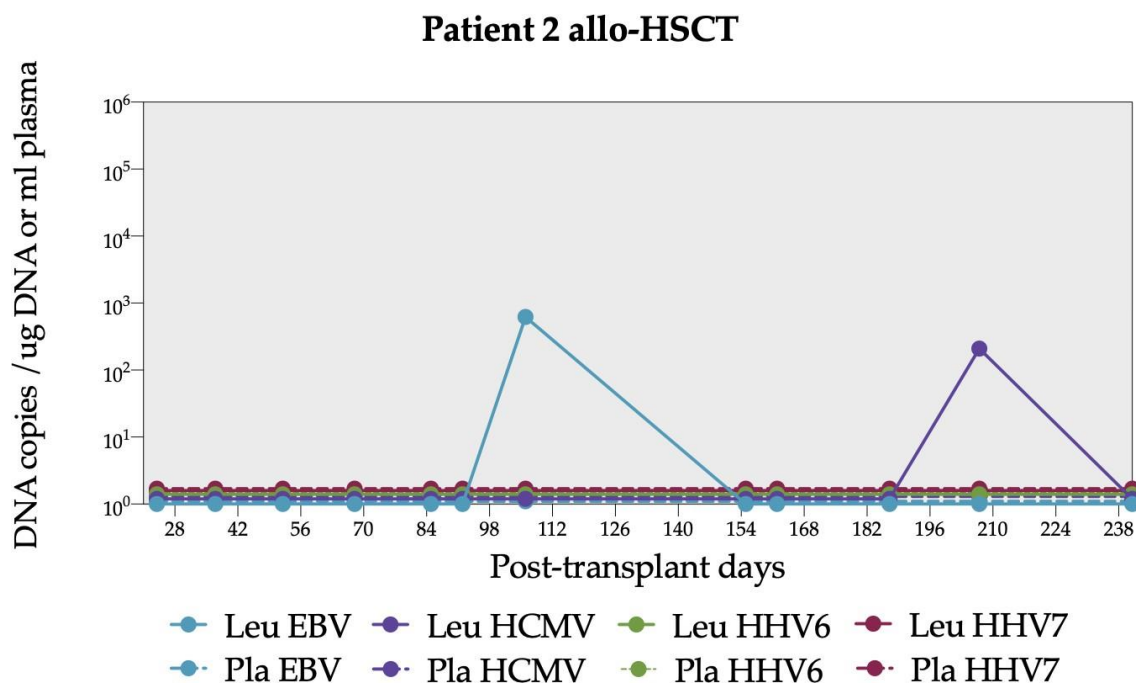

(b). Kinetics of infections in patient 2 who received allogeneic hematopoietic stem cell transplant (HSCT). The follow up is shown in the X axis and the viral load in the Y axis. Each virus is represented with a specific color. Viral loads are expressed as DNA copies/ ug DNA in leukocytes or ml plasma.

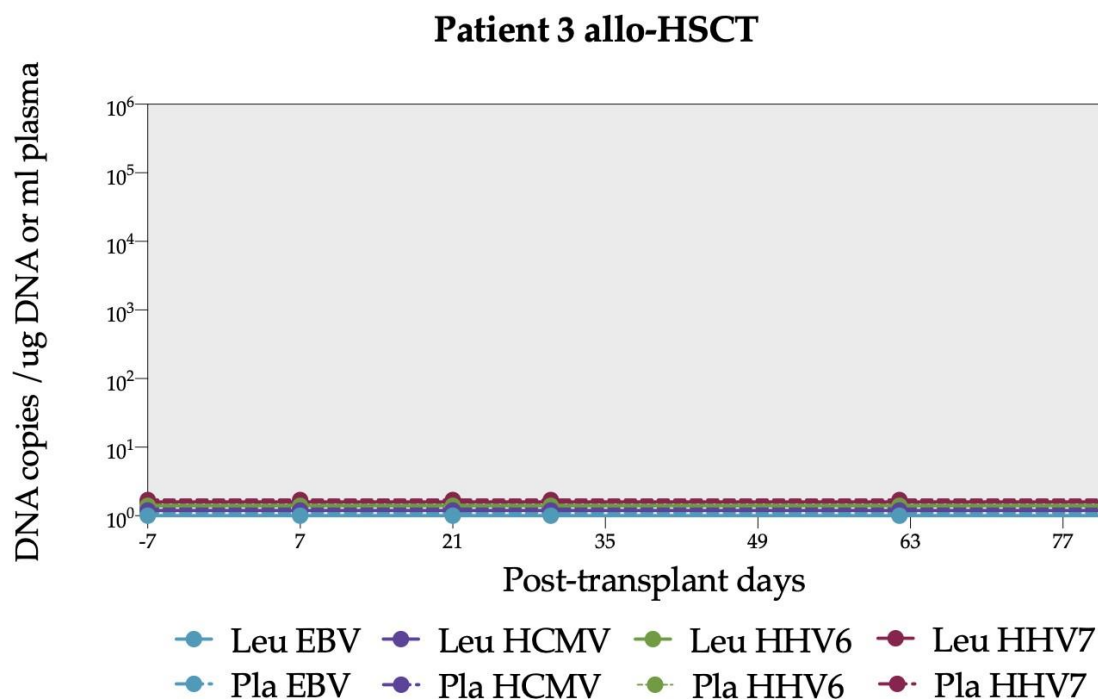

(c). Kinetics of infections in patient 3 who received allogeneic hematopoietic stem cell transplant (HSCT). The follow up is shown in the X axis and the viral load in the Y axis. Each virus is represented with a specific color. Viral loads are expressed as DNA copies/ ug DNA in leukocytes or ml plasma.

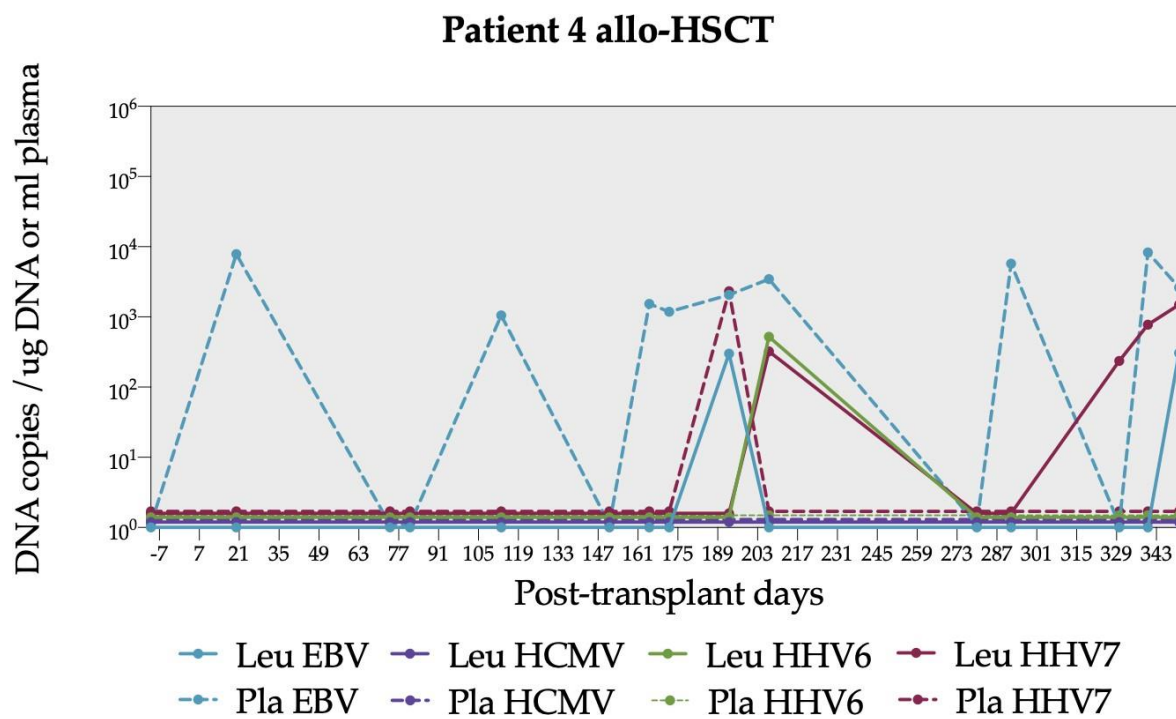

(d). Kinetics of infections in patient 4 who received allogeneic hematopoietic stem cell transplant (HSCT). The follow up is shown in the X axis and the viral load in the Y axis. Each virus is represented with a specific color. Viral loads are expressed as DNA copies/ ug DNA in leukocytes or ml plasma.

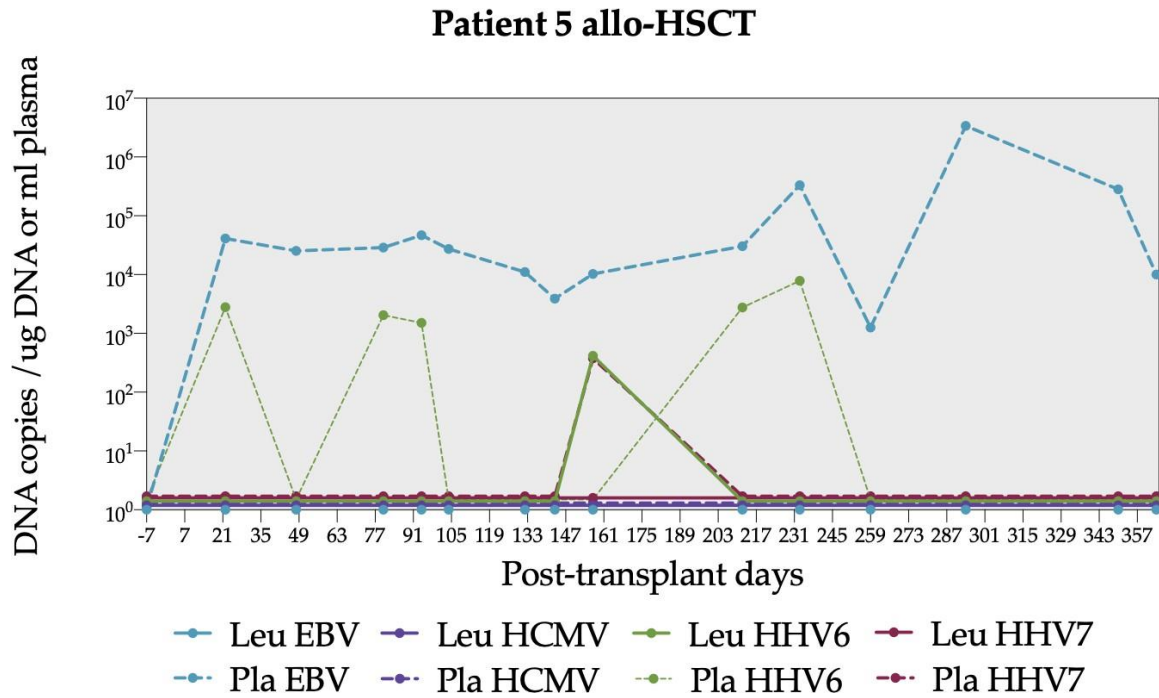

(e) Kinetics of infections in patient 5 who received allogeneic hematopoietic stem cell transplant (HSCT). The follow up is shown in the X axis and the viral load in the Y axis. Each virus is represented with a specific color. Viral loads are expressed as DNA copies/ ug DNA in leukocytes or ml plasma.

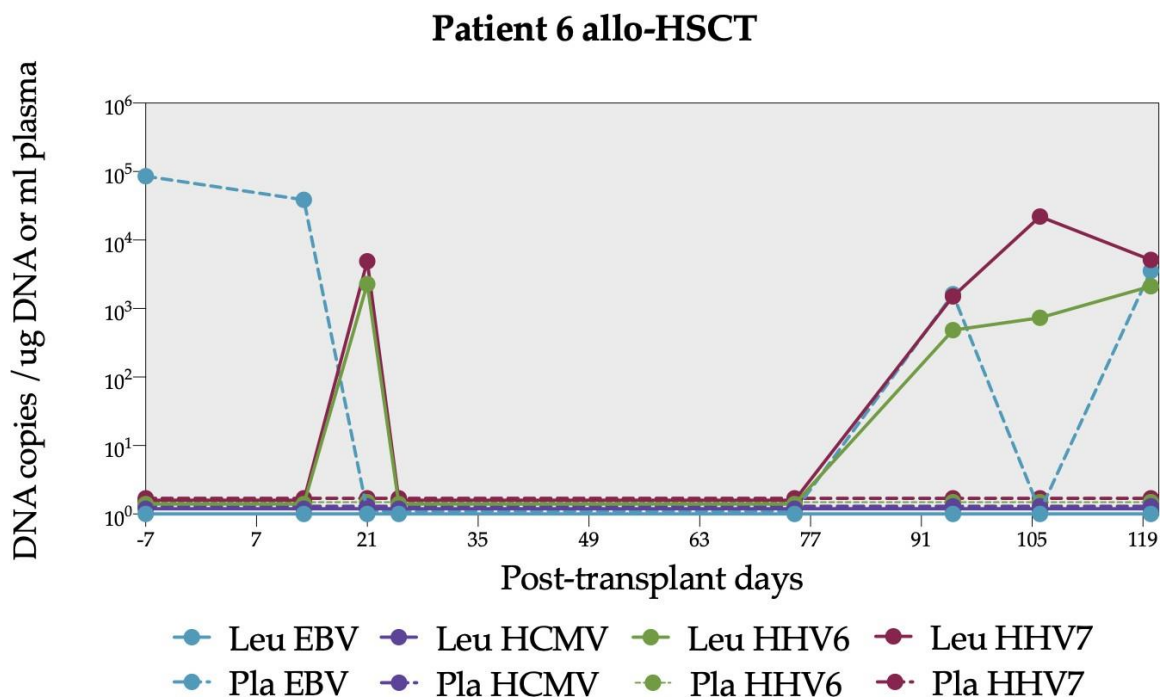

(f) Kinetics of infections in patient 6 who received allogeneic hematopoietic stem cell transplant (HSCT). The follow up is shown in the X axis and the viral load in the Y axis. Each virus is represented with a specific color. Viral loads are expressed as DNA copies/ ug DNA in leukocytes or ml plasma.

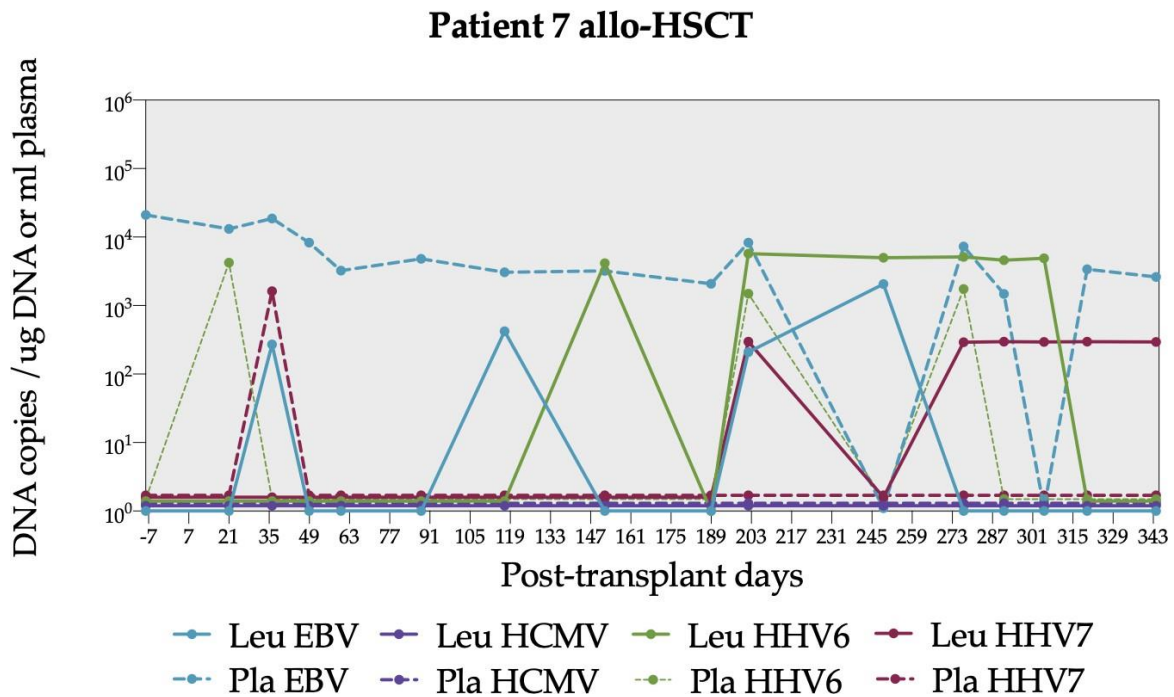

(g) Kinetics of infections in patient 7 who received allogeneic hematopoietic stem celltransplant (HSCT). The follow up is shown in the X axis and the viral load in the Y axis. Each virus is represented with a specific color. Viral loads are expressed as DNA copies/ ug DNA in leukocytes or ml plasma.

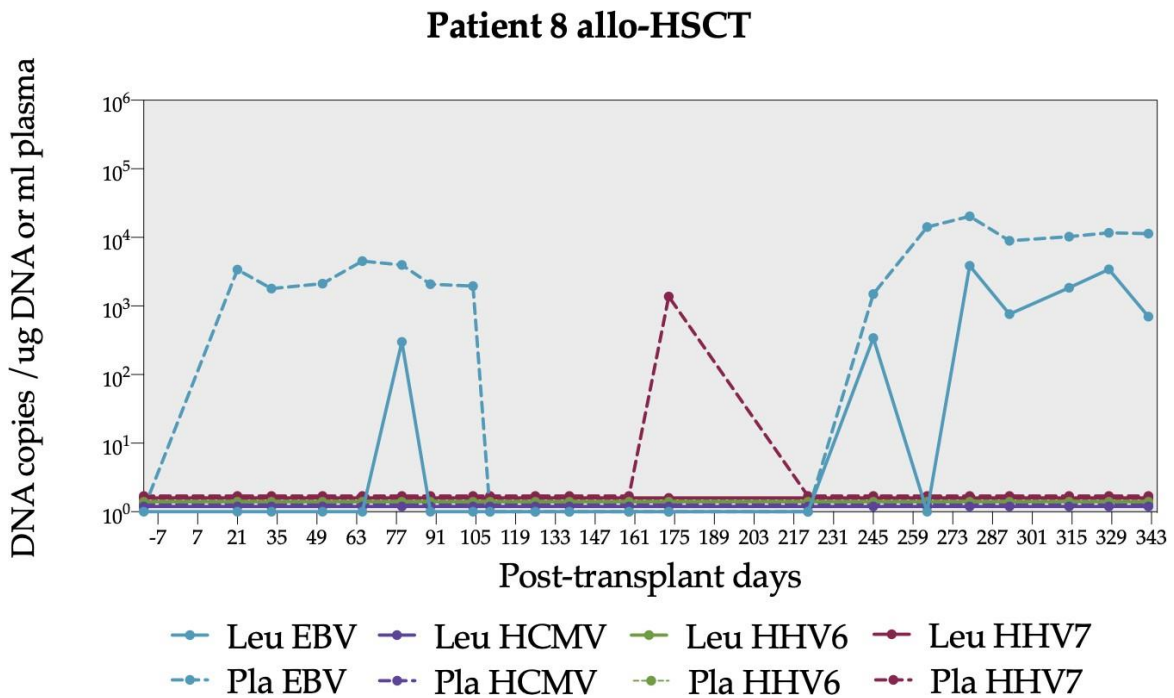

(h) Kinetics of infections in patient 8 who received allogeneic hematopoietic stem celltransplant (HSCT). The follow up is shown in the X axis and the viral load in the Y axis. Each virus is represented with a specific color. Viral loads are expressed as DNA copies/ ug DNA in leukocytes or ml plasma.

### Patient 9 allo-HSCT

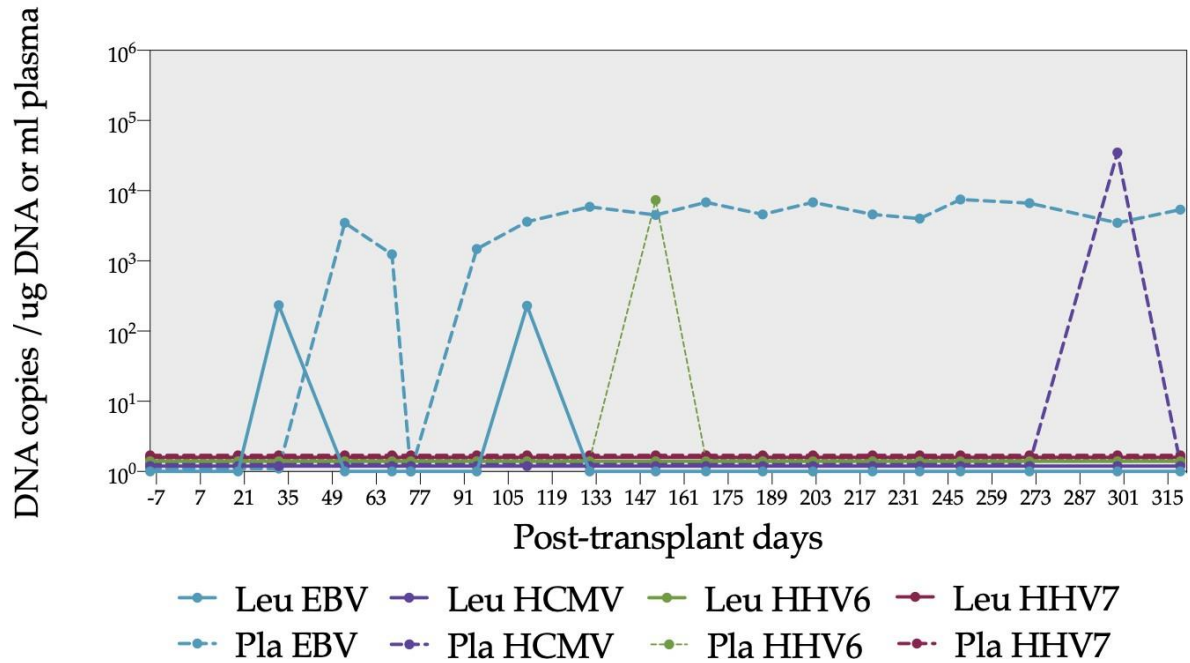

(i) Kinetics of infections in patient 9 who received allogeneic hematopoietic stem cell transplant (HSCT). The follow up is shown in the X axis and the viral load in the Y axis. Each virus is represented with a specific color. Viral loads are expressed as DNA copies/ ug DNA in leukocytes or ml plasma.

### Patient 10 allo-HSCT

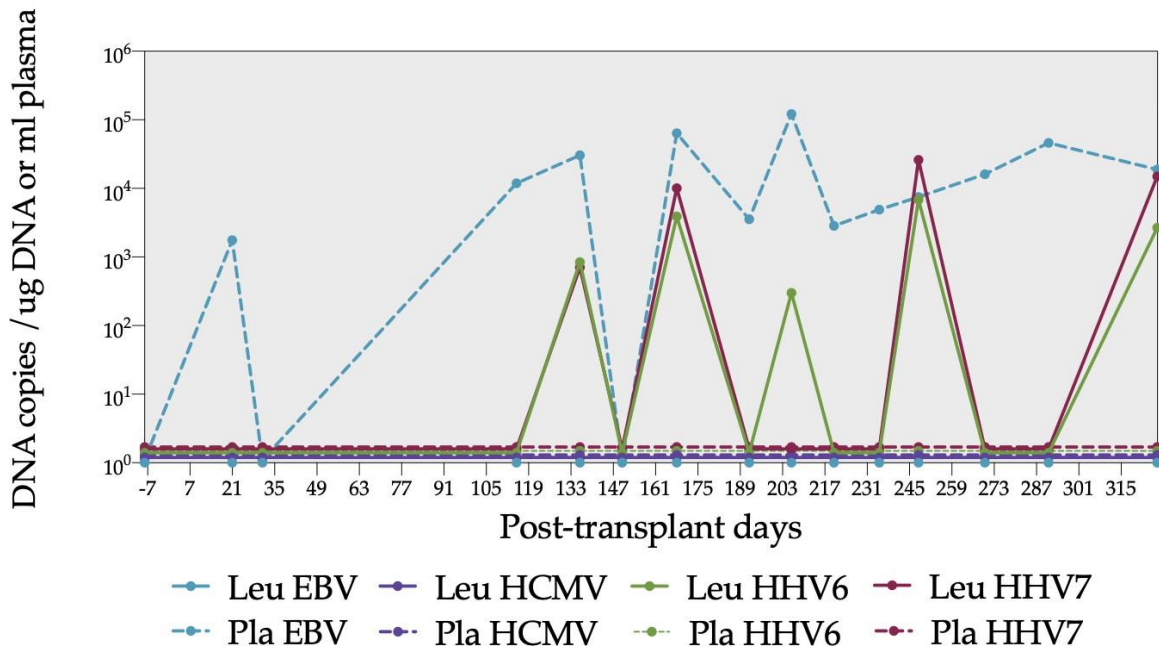

(j) Kinetics of infections in patient 10 who received allogeneic hematopoietic stem cell transplant (HSCT). The follow up is shown in the X axis and the viral load in the Y axis. Each virus is represented with a specific color. Viral loads are expressed as DNA copies/ ug DNA in leukocytes or ml plasma.



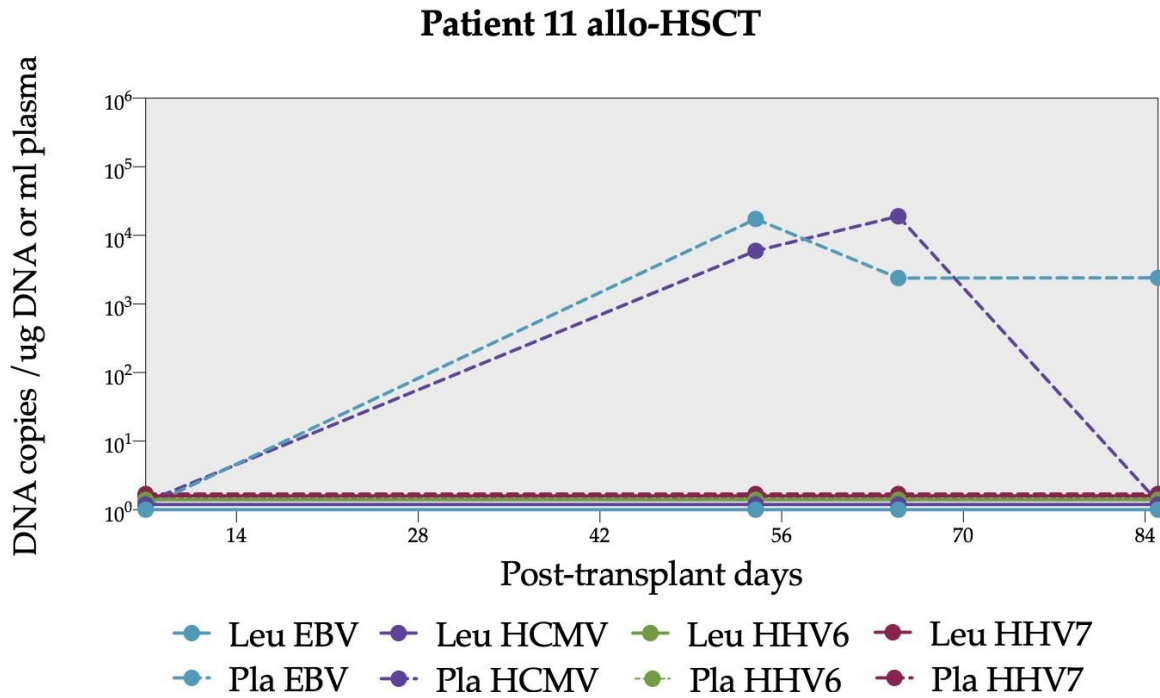

(k) Kinetics of infections in patient 11 who received allogeneic hematopoietic stem celltransplant (HSCT). The follow up is shown in the X axis and the viral load in the Y axis. Each virus is represented with a specific color. Viral loads are expressed as DNA copies/ ug DNA in leukocytes or ml plasma.

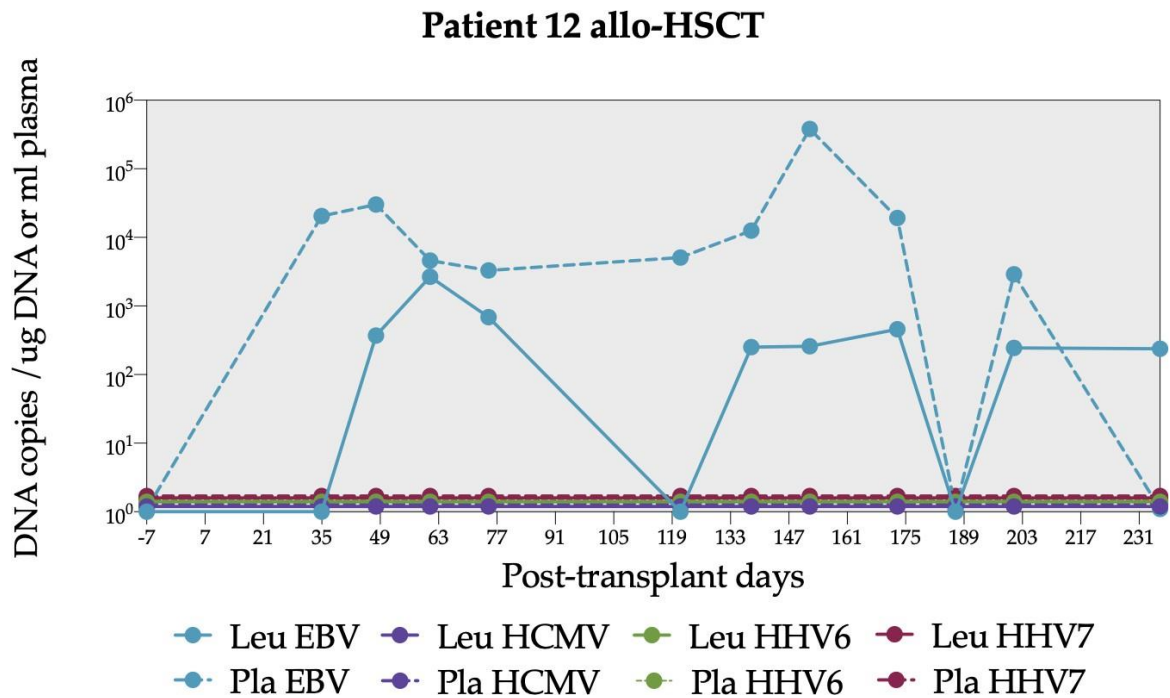

(l) Kinetics of infections in patient 12 who received allogeneic hematopoietic stem celltransplant (HSCT). The follow up is shown in the X axis and the viral load in the Y axis. Each virus is represented with a specific color. Viral loads are expressed as DNA copies/ ug DNA in leukocytes or ml plasma.

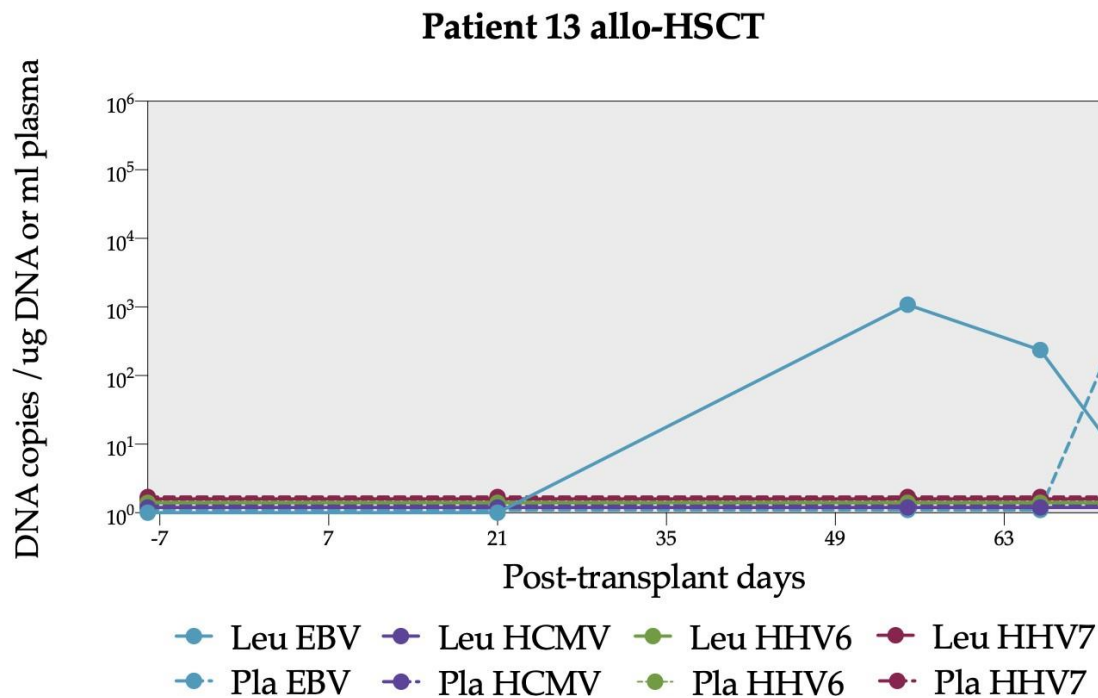

(m) Kinetics of infections in patient 13 who received allogeneic hematopoietic stem cell transplant (HSCT). The follow up is shown in the X axis and the viral load in the Y axis. Each virus is represented with a specific color. Viral loads are expressed as DNA copies/ ug DNA in leukocytes or ml plasma.

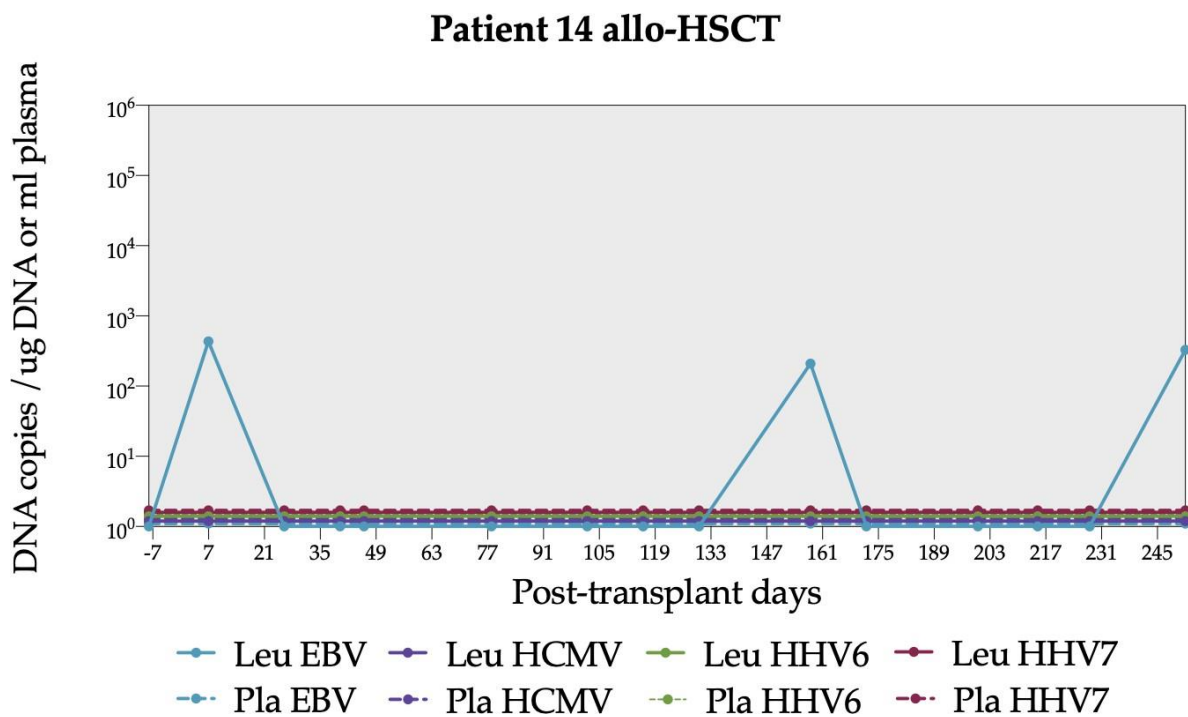

(n) Kinetics of infections in patient 14 who received allogeneic hematopoietic stem cell transplant (HSCT). The follow up is shown in the X axis and the viral load in the Y axis. Each virus is represented with a specific color. Viral loads are expressed as DNA copies/ ug DNA in leukocytes or ml plasma.

### Patient 15 allo-HSCT

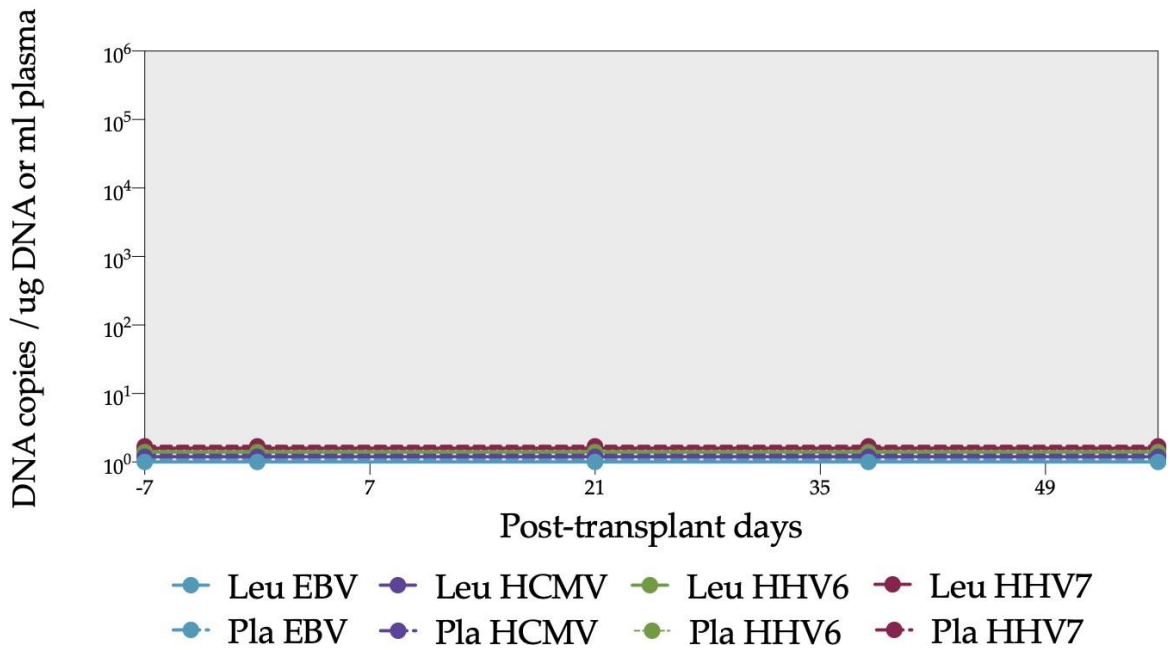

(o) Kinetics of infections in patient 15 who received allogeneic hematopoietic stem cell transplant (HSCT). The follow up is shown in the X axis and the viral load in the Y axis. Each virus is represented with a specific color. Viral loads are expressed as DNA copies/ ug DNA in leukocytes or ml plasma.

### Patient 16 allo-HSCT

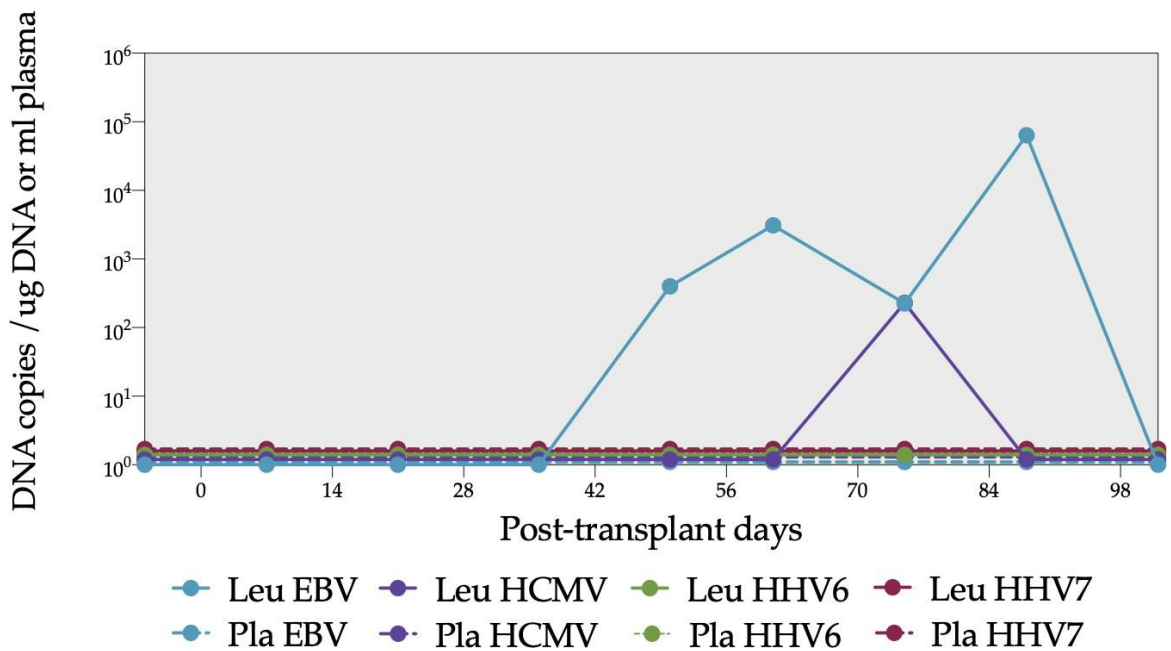

(p) Kinetics of infections in patient 16 who received allogeneic hematopoietic stem cell transplant (HSCT). The follow up is shown in the X axis and the viral load in the Y axis. Each virus is represented with a specific color. Viral loads are expressed as DNA copies/ ug DNA in leukocytes or ml plasma.



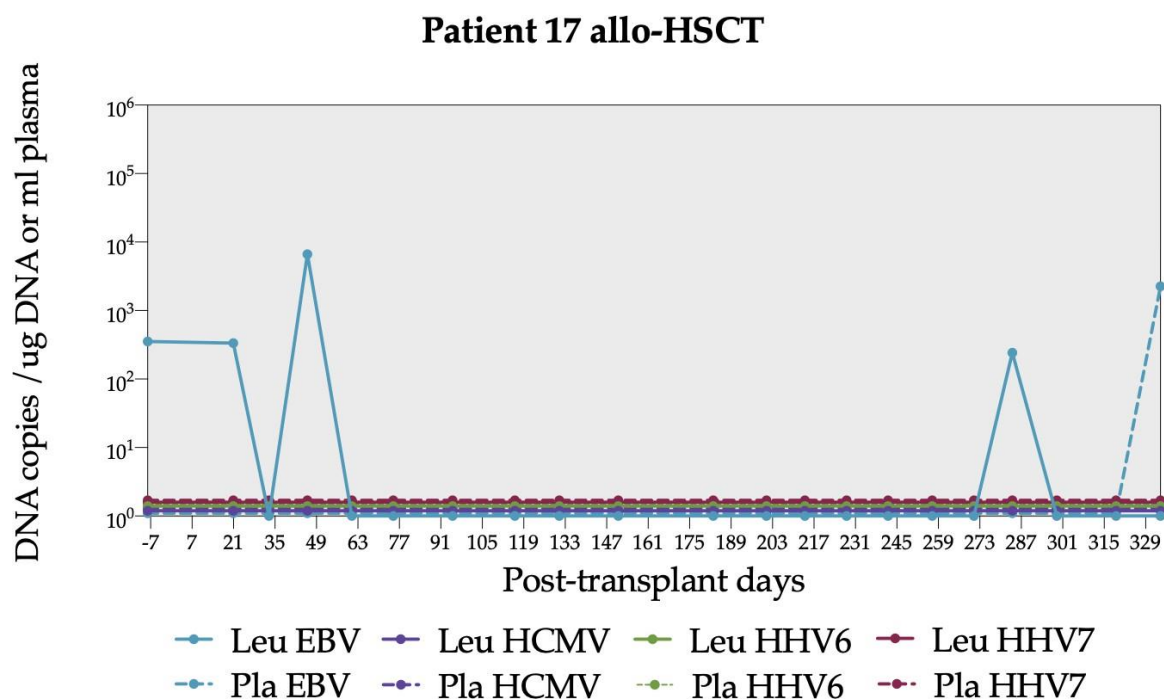

(q) Kinetics of infections in patient 17 who received allogeneic hematopoietic stem cell transplant (HSCT). The follow up is shown in the X axis and the viral load in the Y axis. Each virus is represented with a specific color. Viral loads are expressed as DNA copies/ ug DNA in leukocytes or ml plasma.

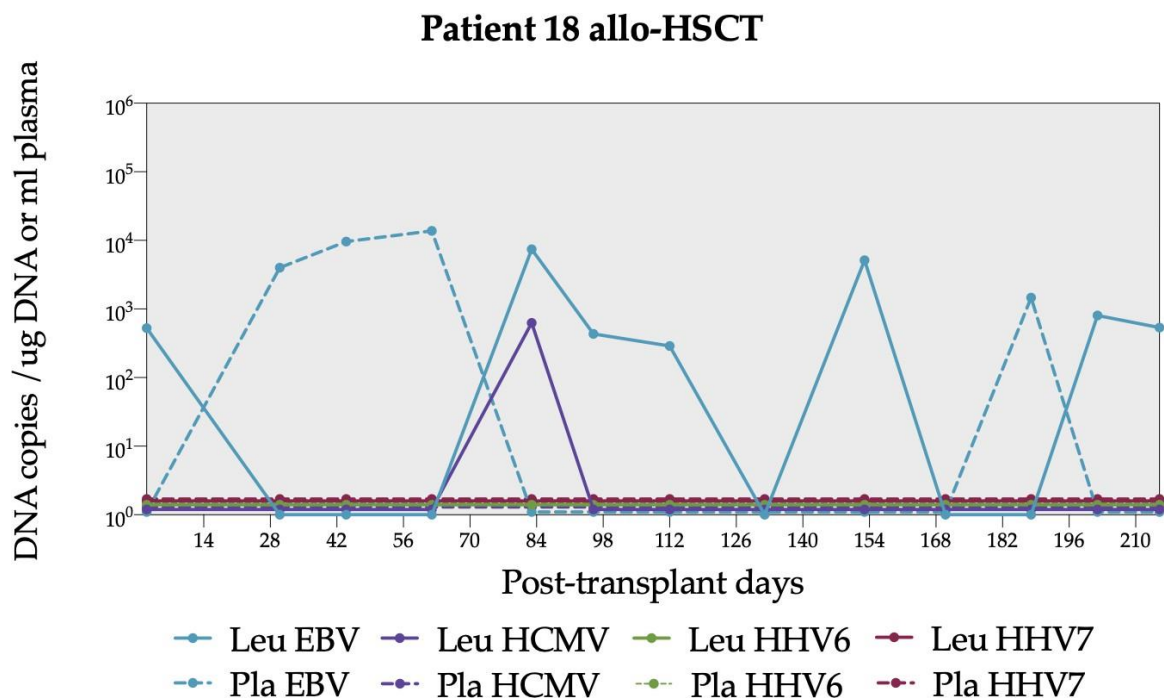

(r) Kinetics of infections in patient 18 who received allogeneic hematopoietic stem cell transplant (HSCT). The follow up is shown in the X axis and the viral load in the Y axis. Each virus is represented with a specific color. Viral loads are expressed as DNA copies/ ug DNA in leukocytes or ml plasma.

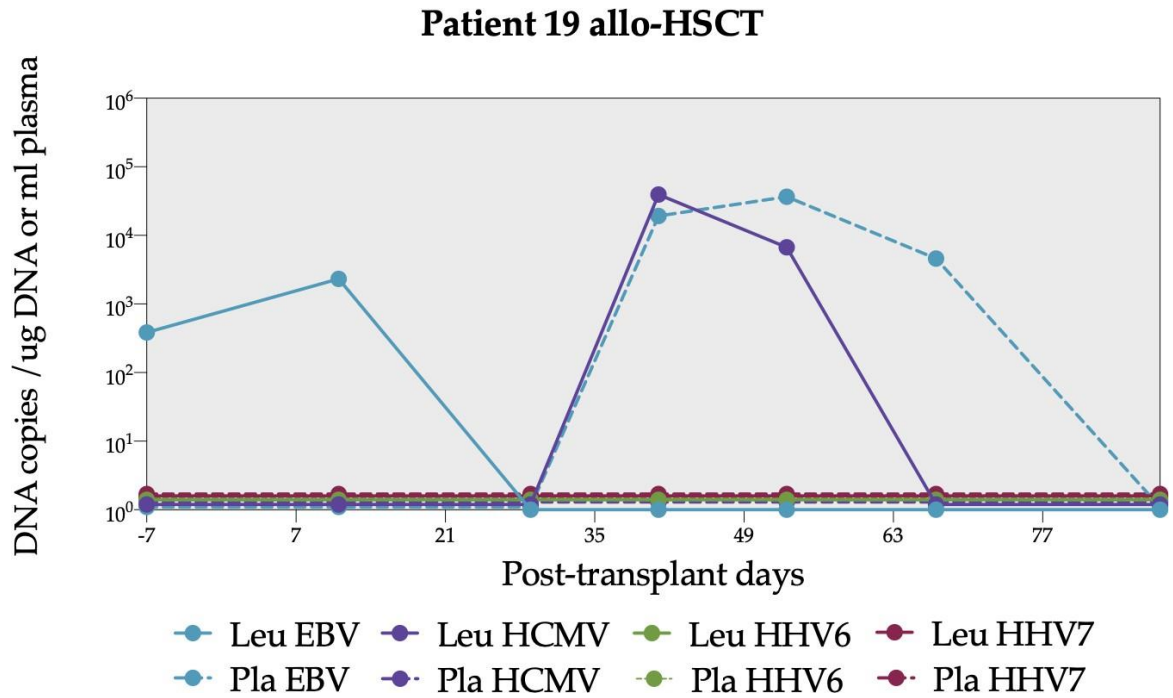

(s) Kinetics of infections in patient 19 who received allogeneic hematopoietic stem celltransplant (HSCT). The follow up is shown in the X axis and the viral load in the Y axis. Each virus is represented with a specific color. Viral loads are expressed as DNA copies/ ug DNA in leukocytes or ml plasma.

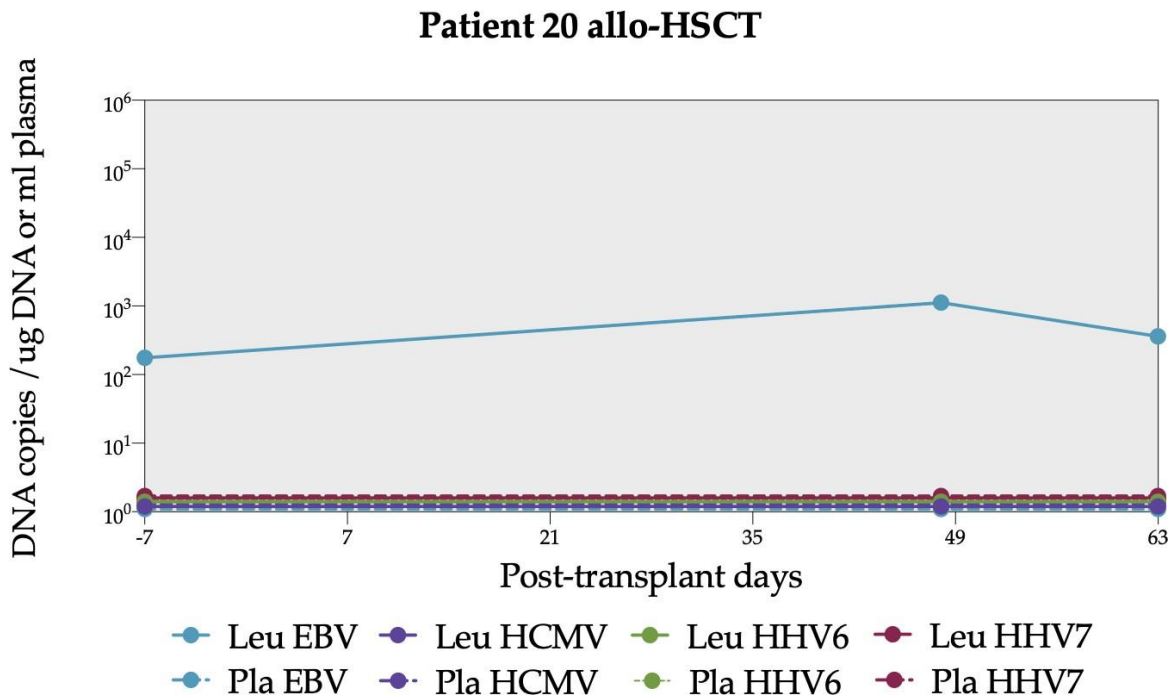

(t) Kinetics of infections in patient 20 who received allogeneic hematopoietic stem celltransplant (HSCT). The follow up is shown in the X axis and the viral load in the Y axis. Each virus is represented with a specific color. Viral loads are expressed as DNA copies/ ug DNA in leukocytes or ml plasma.

### Patient 21 allo-HSCT

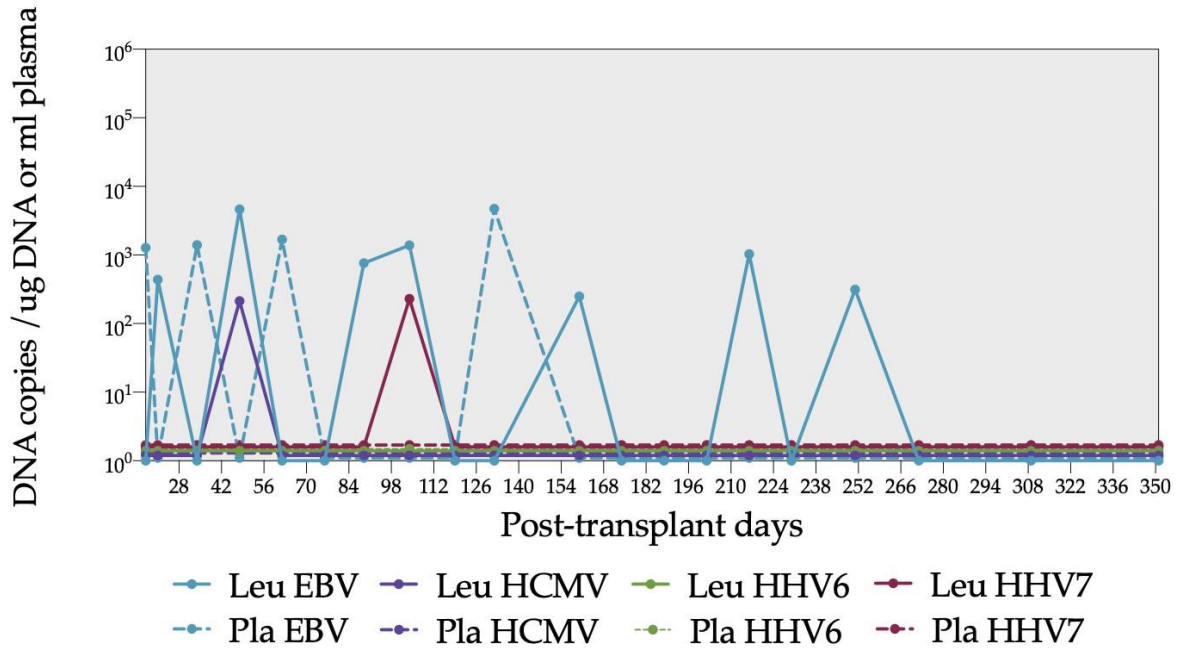

(u) Kinetics of infections in patient 21 who received allogeneic hematopoietic stem cell transplant (HSCT). The follow up is shown in the X axis and the viral load in the Y axis. Each virus is represented with a specific color. Viral loads are expressed as DNA copies/ ug DNA in leukocytes or ml plasma.

### Patient 22 allo-HSCT

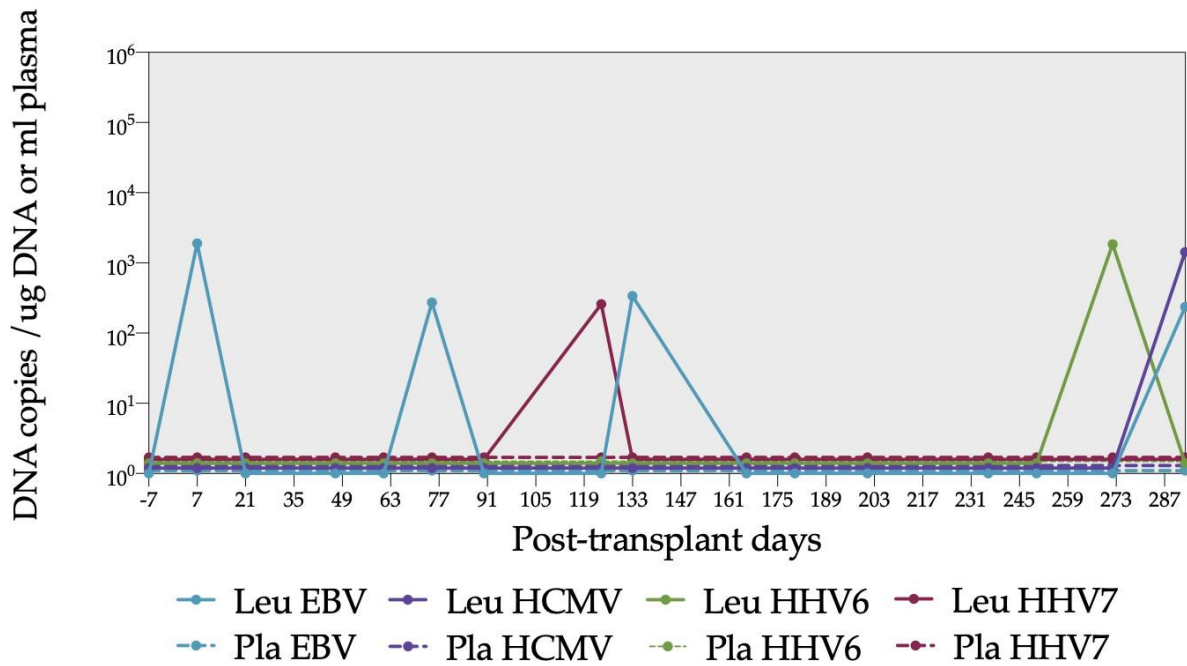

(v) Kinetics of infections in patient 22 who received allogeneic hematopoietic stem cell transplant (HSCT). The follow up is shown in the X axis and the viral load in the Y axis. Each virus is represented with a specific color. Viral loads are expressed as DNA copies/ ug DNA in leukocytes or ml plasma.

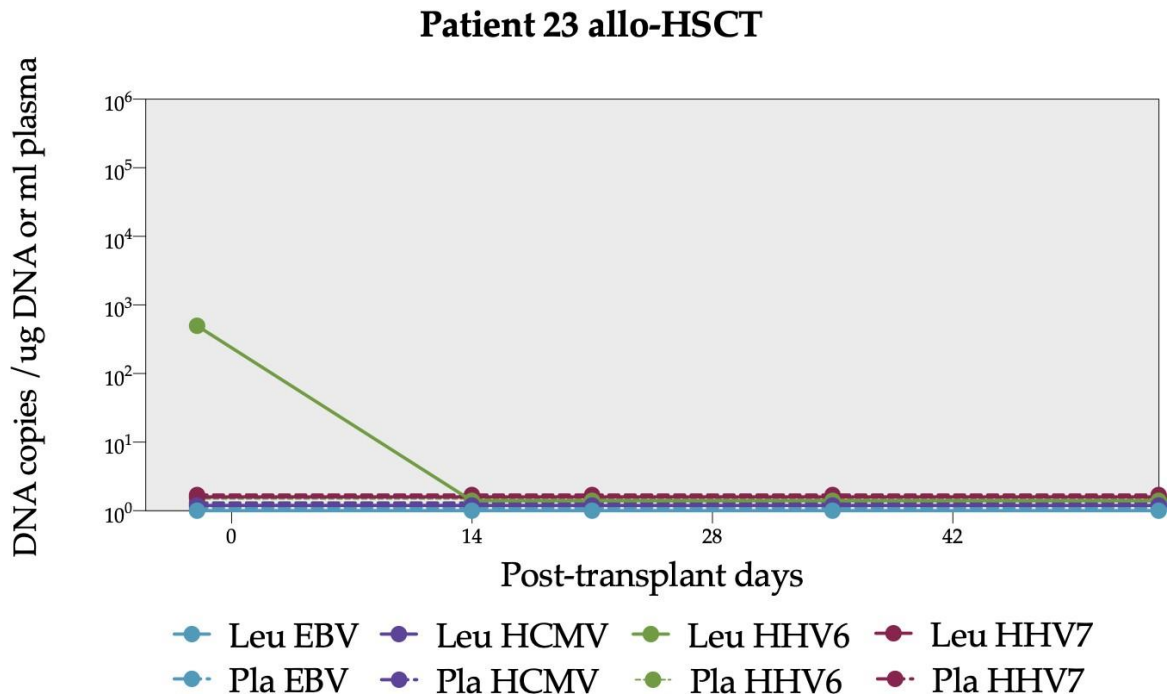

(w) Kinetics of infections in patient 23 who received allogeneic hematopoietic stem cell transplant (HSCT). The follow up is shown in the X axis and the viral load in the Y axis. Each virus is represented with a specific color. Viral loads are expressed as DNA copies/ ug DNA in leukocytes or ml plasma.

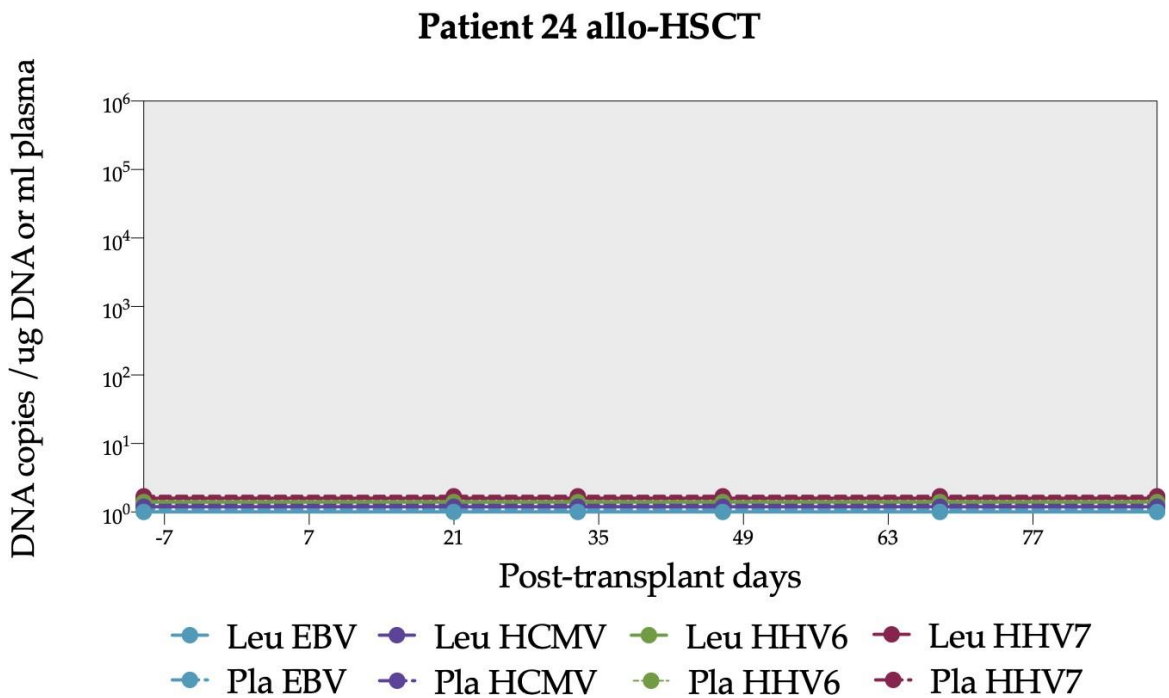

(x) Kinetics of infections in patient 24 who received allogeneic hematopoietic stem cell transplant (HSCT). The follow up is shown in the X axis and the viral load in the Y axis. Each virus is represented with a specific color. Viral loads are expressed as DNA copies/ ug DNA in leukocytes or ml plasma.

### Patient 25 allo-HSCT

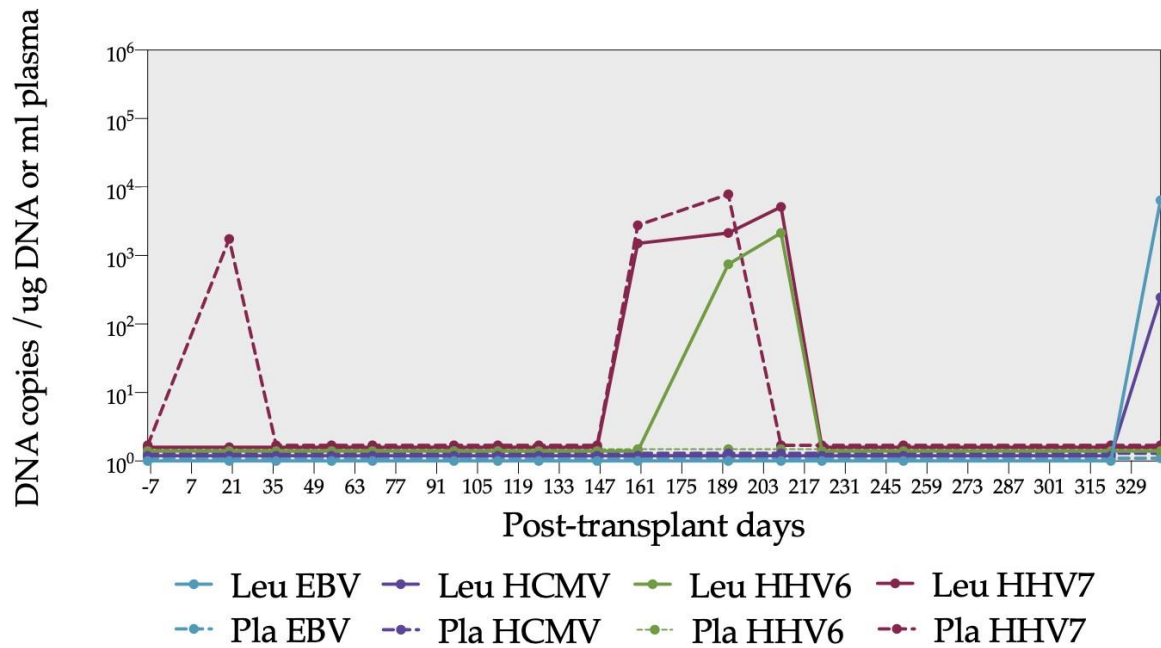

(y) Kinetics of infections in patient 25 who received allogeneic hematopoietic stem cell transplant (HSCT). The follow up is shown in the X axis and the viral load in the Y axis. Each virus is represented with a specific color. Viral loads are expressed as DNA copies/ ug DNA in leukocytes or ml plasma.

### Patient 26 allo-HSCT

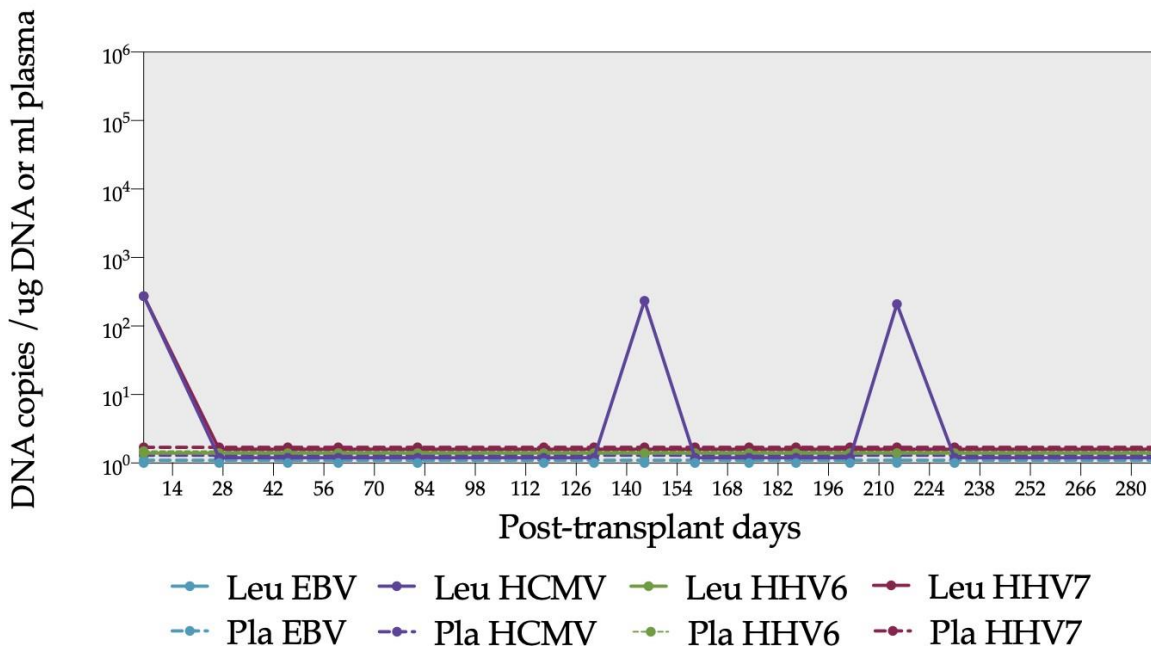

(z) Kinetics of infections in patient 26 who received allogeneic hematopoietic stem cell transplant (HSCT). The follow up is shown in the X axis and the viral load in the Y axis. Each virus is represented with a specific color. Viral loads are expressed as DNA copies/ ug DNA in leukocytes or ml plasma.



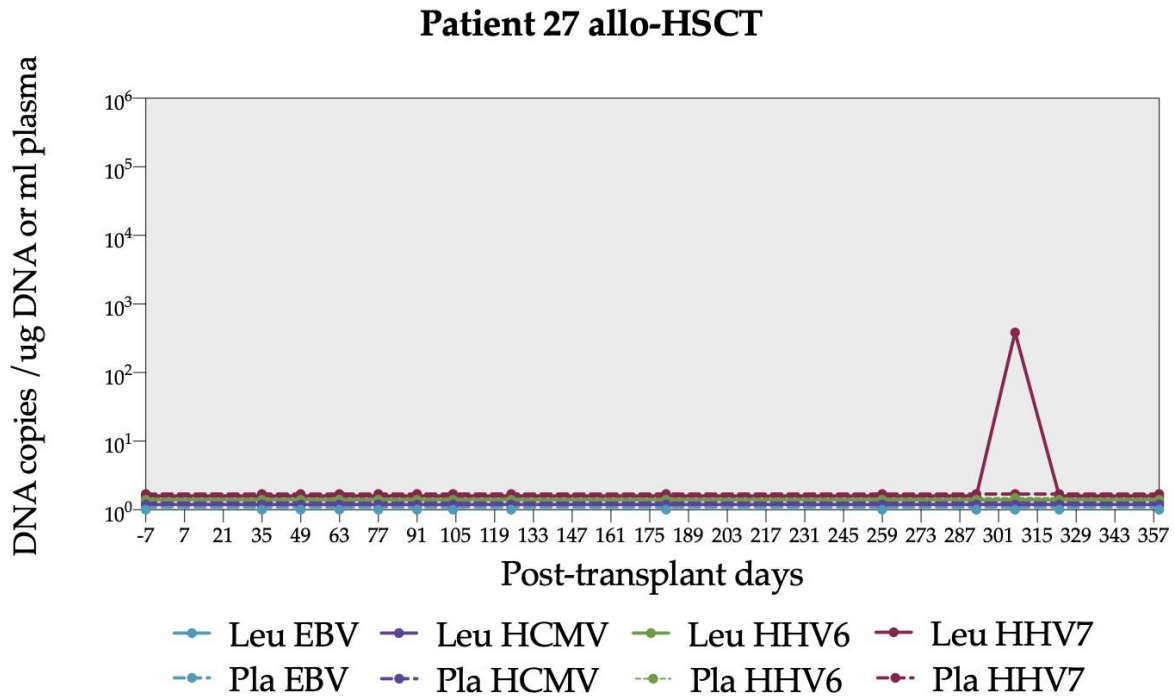

(aa) Kinetics of infections in patient 27 who received allogeneic hematopoietic stem celltransplant (HSCT). The follow up is shown in the X axis and the viral load in the Y axis. Each virus is represented with a specific color. Viral loads are expressed as DNA copies/ ug DNA in leukocytes or ml plasma.

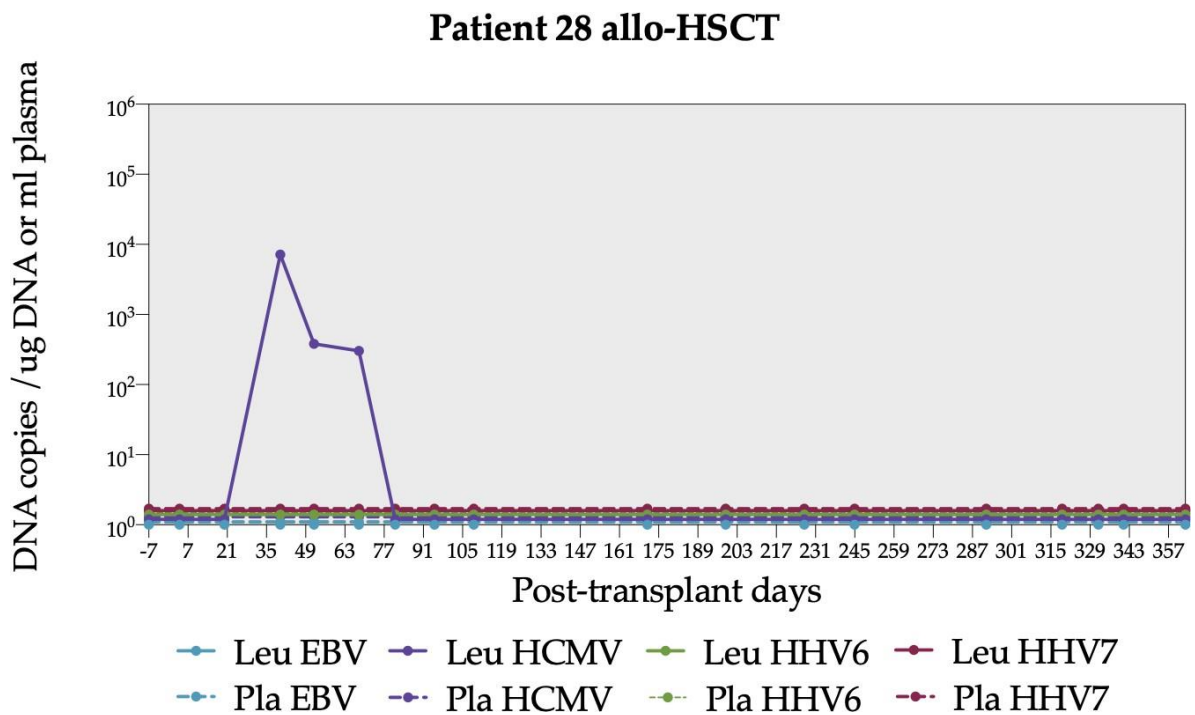

(ab) Kinetics of infections in patient 28 who received allogeneic hematopoietic stem celltransplant (HSCT). The follow up is shown in the X axis and the viral load in the Y axis. Each virus is represented with a specific color. Viral loads are expressed as DNA copies/ ug DNA in leukocytes or ml plasma.

### Patient 29 allo-HSCT

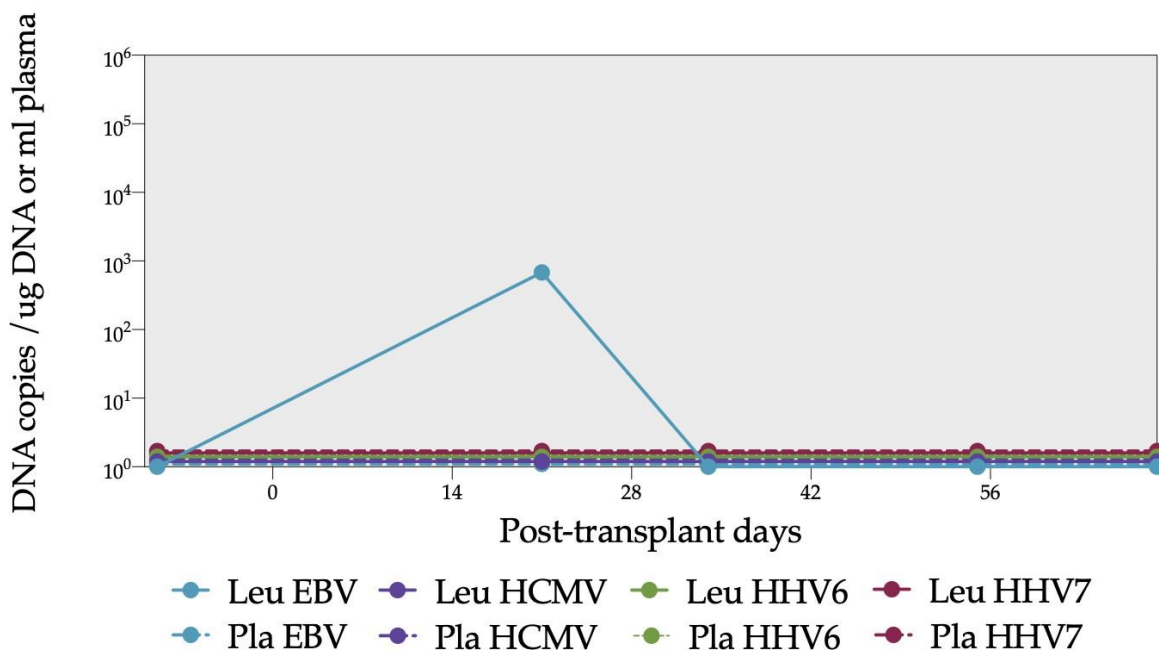

(ab) Kinetics of infections in patient 29 who received allogeneic hematopoietic stem cell transplant (HSCT). The follow up is shown in the X axis and the viral load in the Y axis. Each virus is represented with a specific color. Viral loads are expressed as DNA copies/ ug DNA in leukocytes or ml plasma.

### Patient 30 allo-HSCT

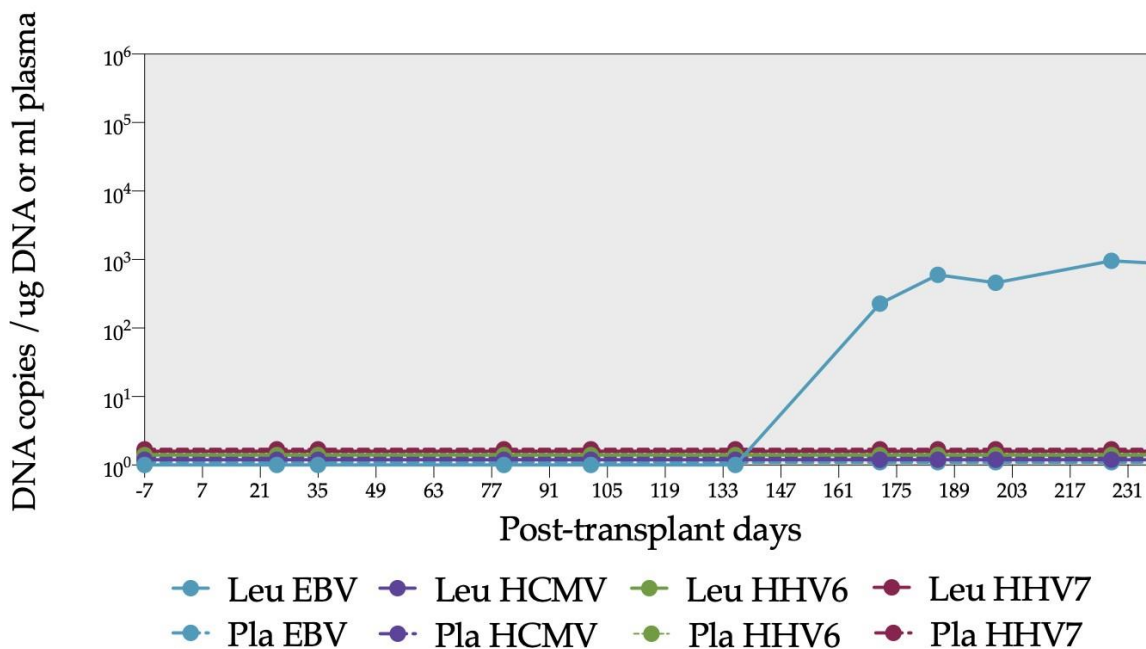

(ad) Kinetics of infections in patient 30 who received allogeneic hematopoietic stem cell transplant (HSCT). The follow up is shown in the X axis and the viral load in the Y axis. Each virus is represented with a specific color. Viral loads are expressed as DNA copies/ ug DNA in leukocytes or ml plasma.

### Patient 31 allo-HSCT

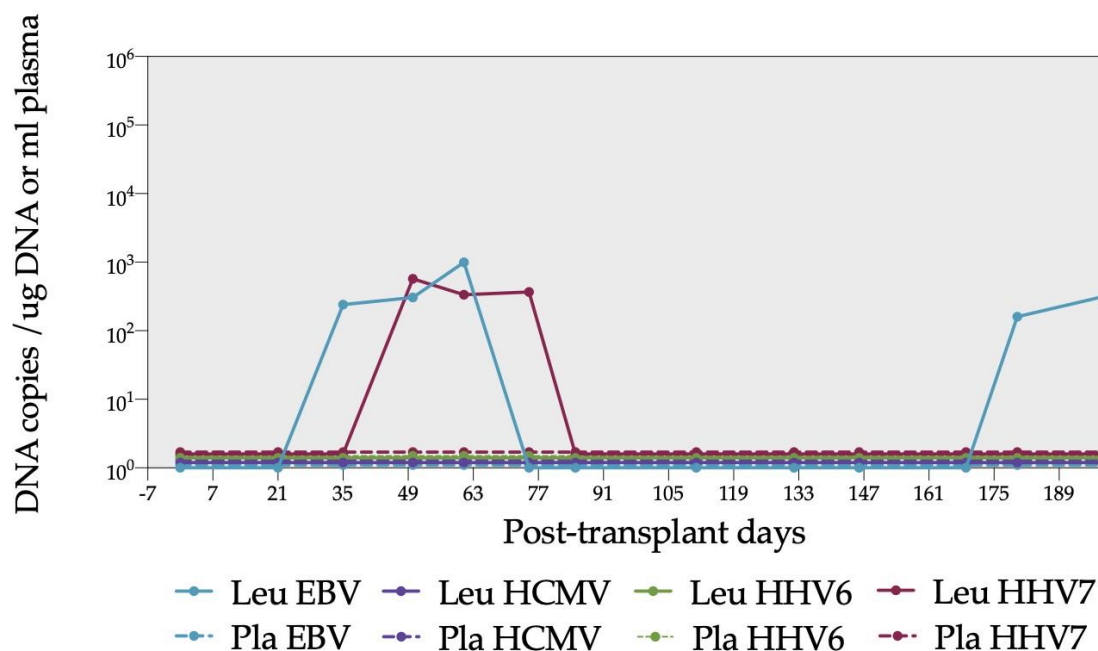

(ae) Kinetics of infections in patient 31 who received allogeneic hematopoietic stem celltransplant (HSCT). The follow up is shown in the X axis and the viral load in the Y axis. Each virus is represented with a specific color. Viral loads are expressed as DNA copies/ ug DNA in leukocytes or ml plasma.

### Patient 32 allo-HSCT

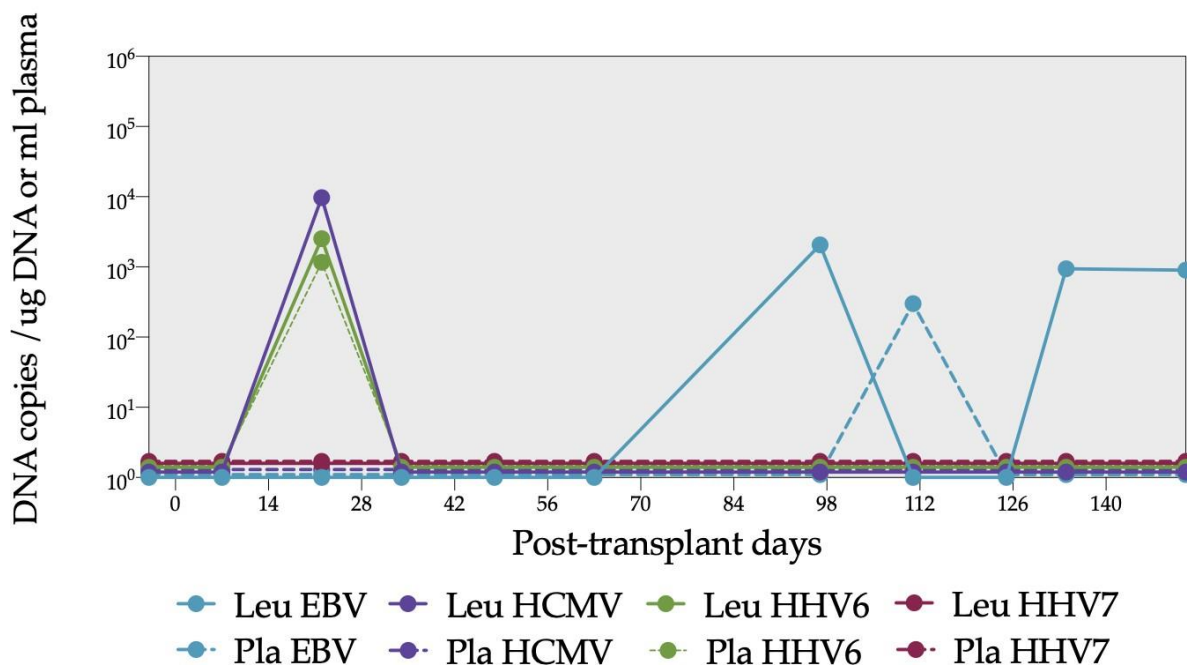

(af) Kinetics of infections in patient 32 who received allogeneic hematopoietic stem celltransplant (HSCT). The follow up is shown in the X axis and the viral load in the Y axis. Each virus is represented with a specific color. Viral loads are expressed as DNA copies/ ug DNA in leukocytes or ml plasma.

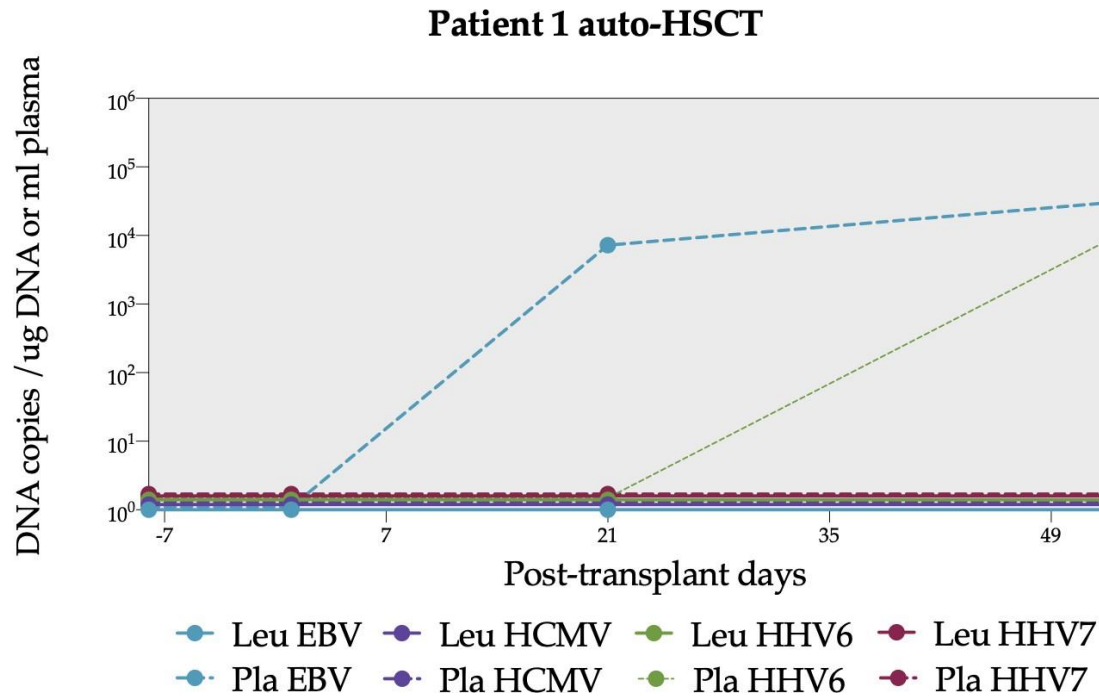

(A) Kinetics of infections in patient 1 who received autologous hematopoietic stem cell transplant (HSCT). The follow up is shown in the X axis and the viral load in the Y axis. Each virus is represented with a specific color. Viral loads are expressed as DNA copies/ ug DNA in leukocytes or ml plasma.

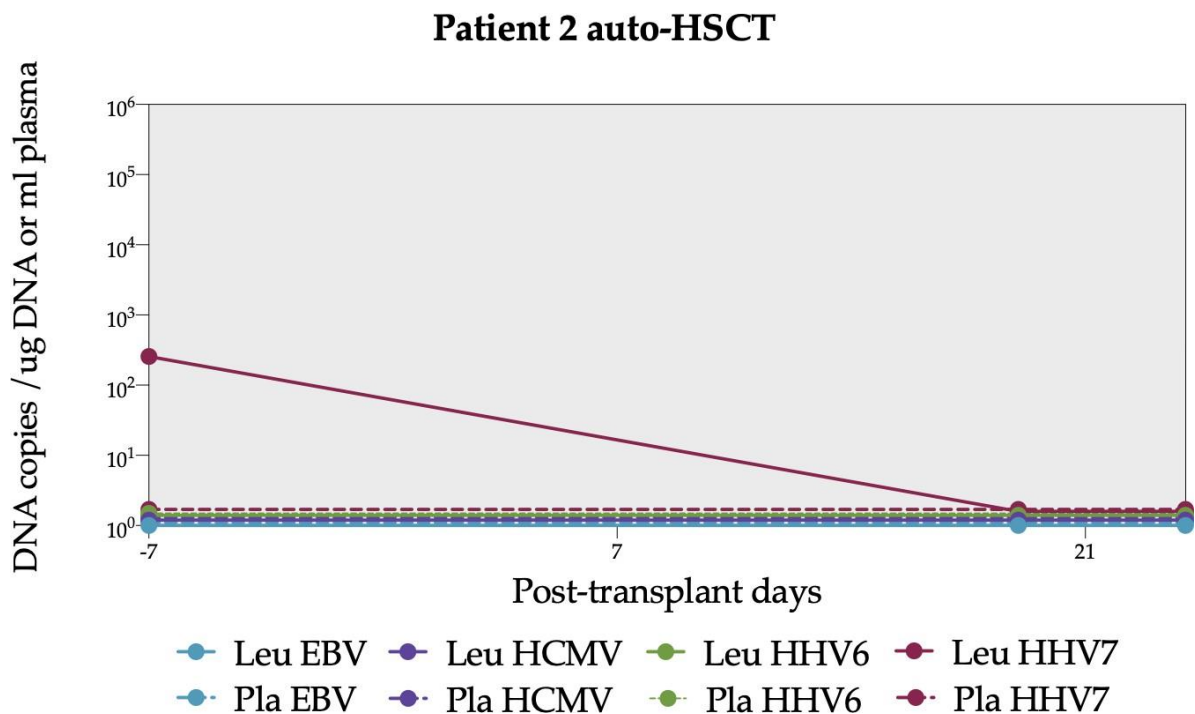

(B) Kinetics of infections in patient 2 who received autologous hematopoietic stem cell transplant (HSCT). The follow up is shown in the X axis and the viral load in the Y axis. Each virus is represented with a specific color. Viral loads are expressed as DNA copies/ ug DNA in leukocytes or ml plasma.

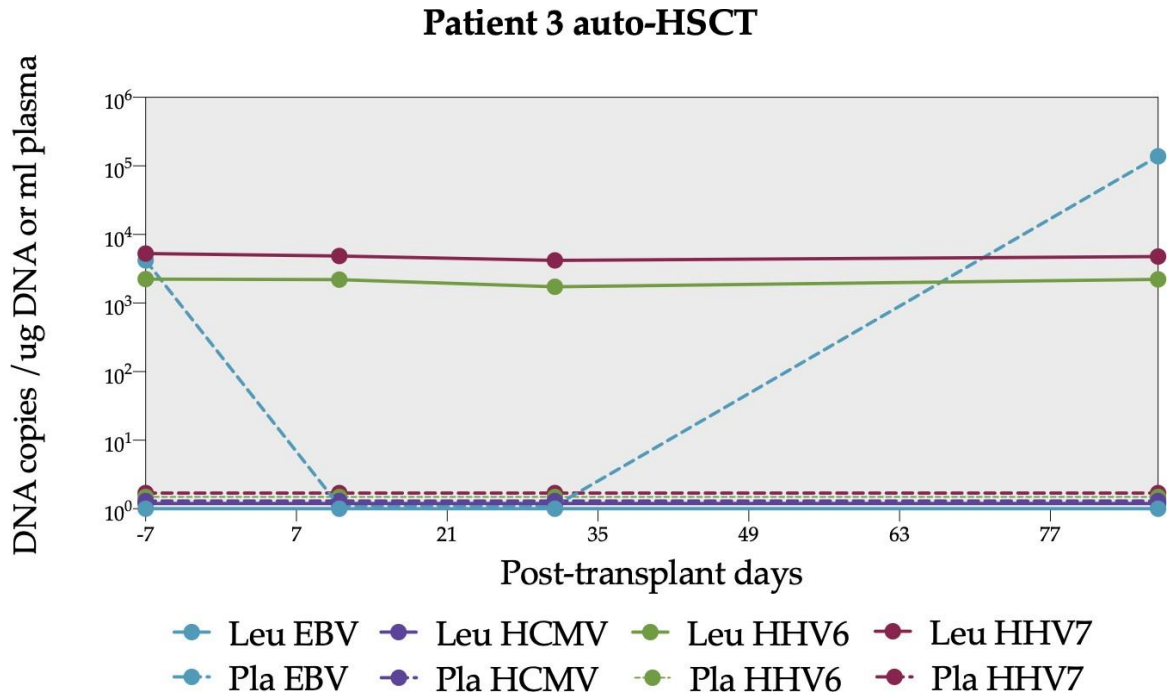

(C) Kinetics of infections in patient 3 who received autologous hematopoietic stem cell transplant (HSCT). The follow up is shown in the X axis and the viral load in the Y axis. Each virus is represented with a specific color. Viral loads are expressed as DNA copies/ ug DNA in leukocytes or ml plasma.

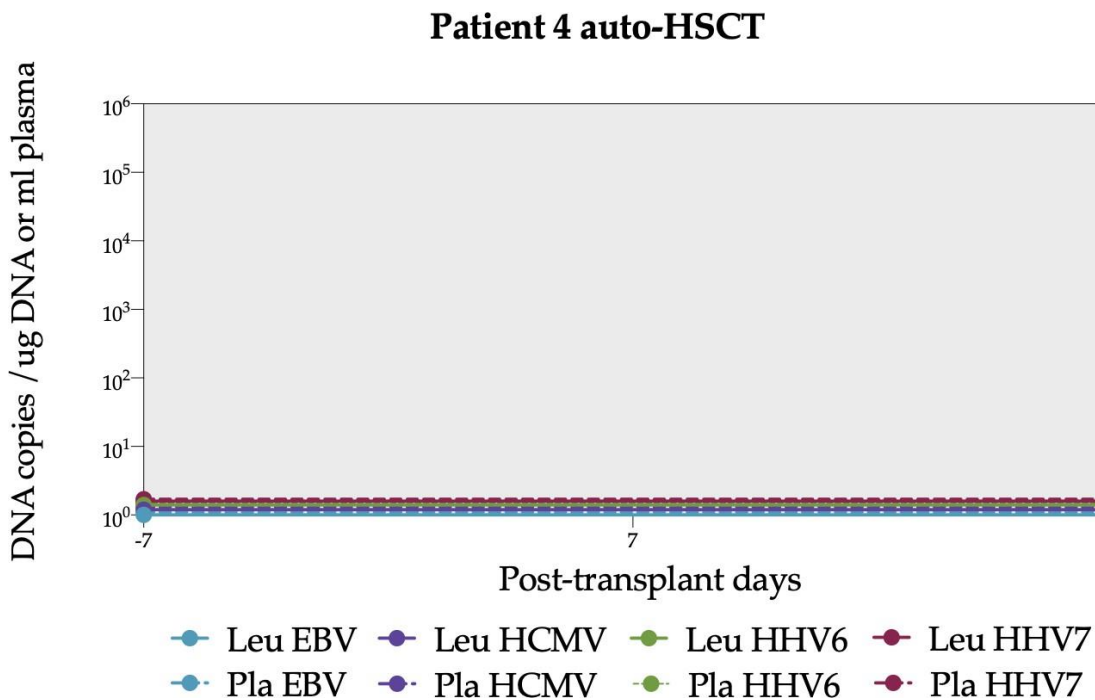

(D) Kinetics of infections in patient 4 who received autologous hematopoietic stem cell transplant (HSCT). The follow up is shown in the X axis and the viral load in the Y axis. Each virus is represented with a specific color. Viral loads are expressed as DNA copies/ ug DNA in leukocytes or ml plasma



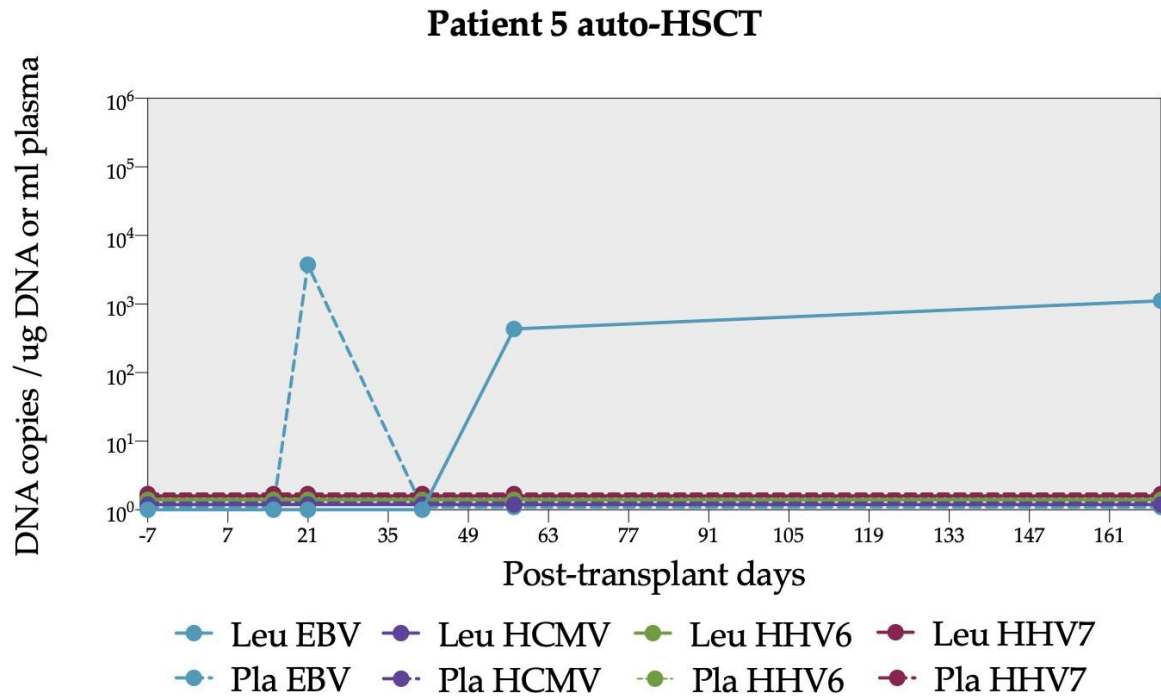

(E) Kinetics of infections in patient 5 who received autologous hematopoietic stem cell transplant (HSCT). The follow up is shown in the X axis and the viral load in the Y axis. Each virus is represented with a specific color. Viral loads are expressed as DNA copies/ ug DNA in leukocytes or ml plasma.

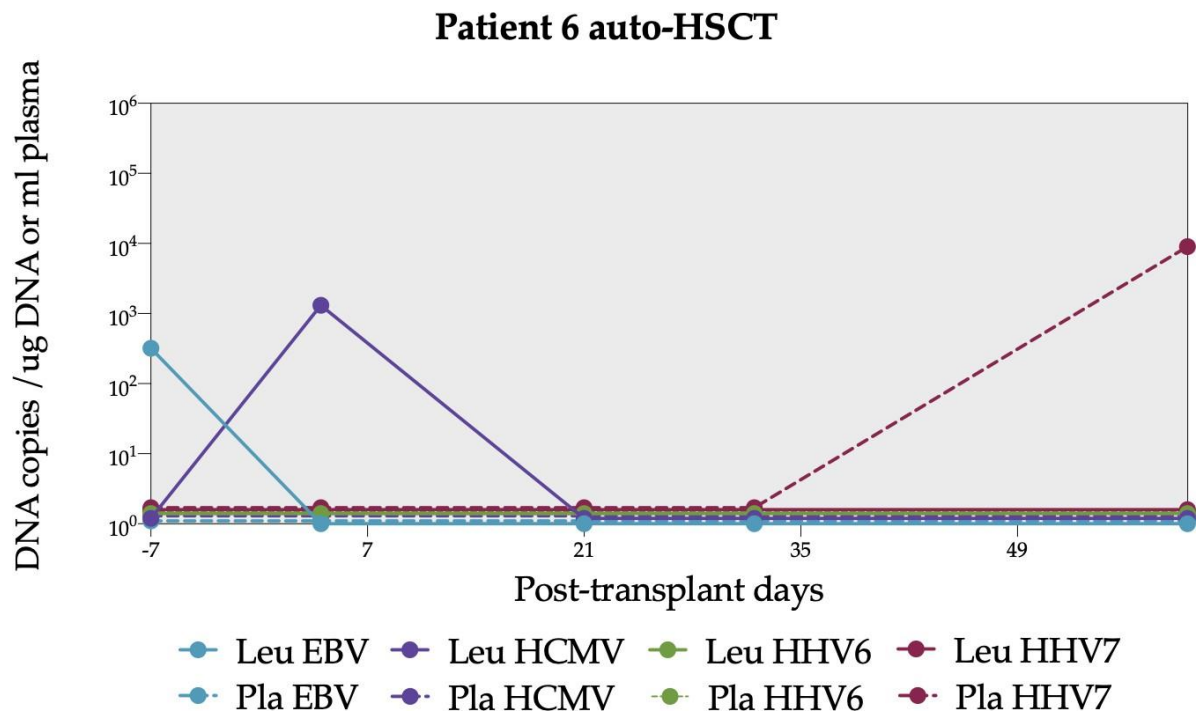

(F) Kinetics of infections in patient 6 who received autologous hematopoietic stem cell transplant (HSCT). The follow up is shown in the X axis and the viral load in the Y axis. Each virus is represented with a specific color. Viral loads are expressed as DNA copies/ ug DNA in leukocytes or ml plasma.

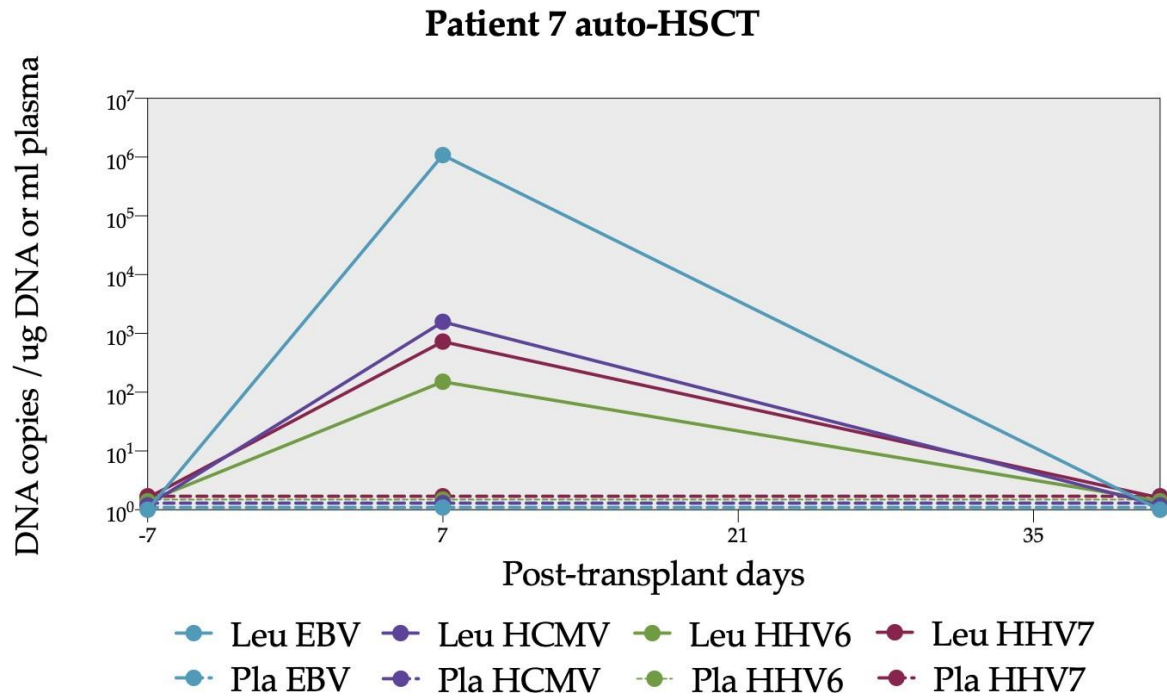

(G) Kinetics of infections in patient 7 who received autologous hematopoietic stem cell transplant (HSCT). The follow up is shown in the X axis and the viral load in the Y axis. Each virus is represented with a specific color. Viral loads are expressed as DNA copies/ ug DNA in leukocytes or ml plasma.

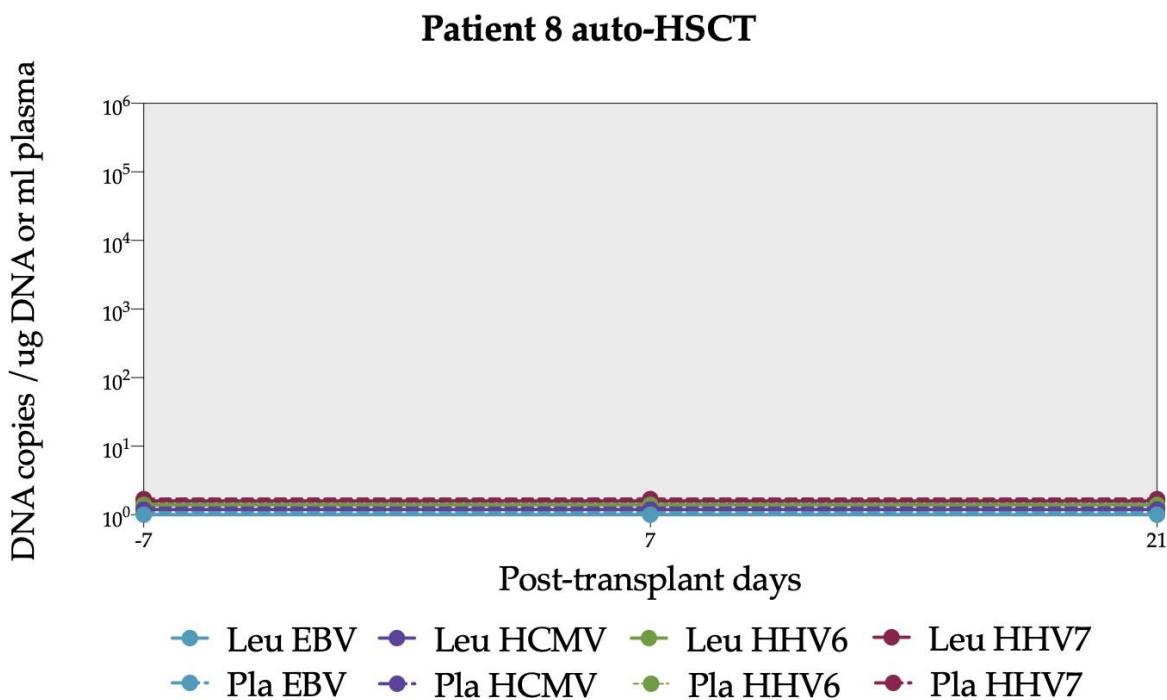

(H) Kinetics of infections in patient 8 who received autologous hematopoietic stem cell transplant (HSCT). The follow up is shown in the X axis and the viral load in the Y axis. Each virus is represented with a specific color. Viral loads are expressed as DNA copies/ ug DNA in leukocytes or ml plasma.

**Supplementary Figure S2.** Viral loads for HCMV in patients with allogeneic and autologous hematopoietic stem cell transplantation (HSCT). Viral loads are expressed as DNA copies/ ug of DNA in leukocytes or ml of plasma. The red line indicates the clinical threshold used at the Children's Hospital of Mexico.

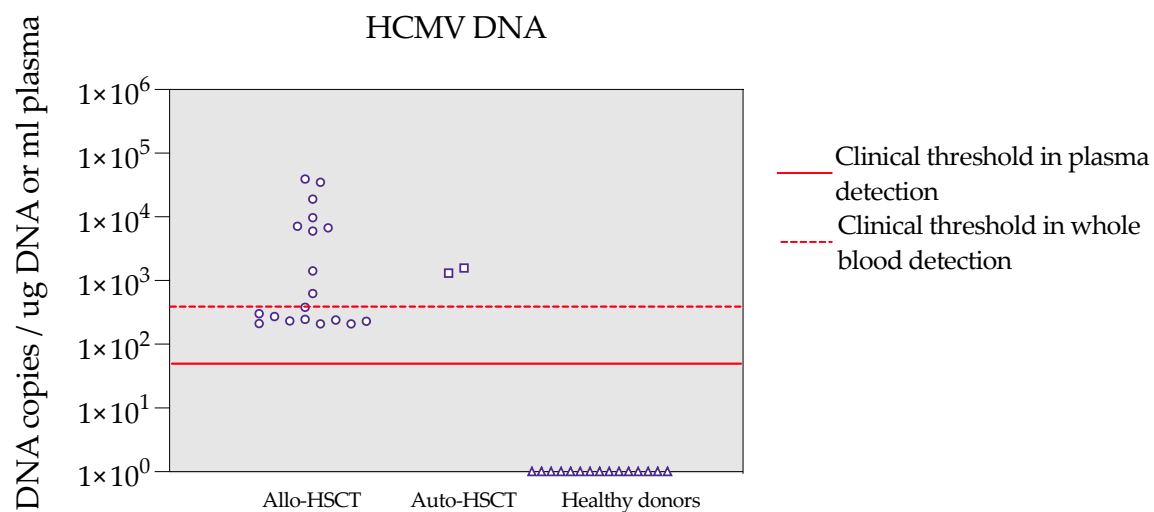

**Supplementary Table S1.** Pre-transplant serology for donors and recipients. Patients (n=40).

| Type of transplant |                      | Pre-transplant EBV serology |               | Pre-transplant HCMV serology |                 |
|--------------------|----------------------|-----------------------------|---------------|------------------------------|-----------------|
|                    |                      | Donor                       | Recipient     | Donor                        | Recipient       |
| Allogeneic (N=32)  | Patient 1 Allo-HSCT  | Without data                | IgG: + IgM: - | Without data                 | IgG: + IgM: -   |
|                    | Patient 2 Allo-HSCT  | Without data                | Without data  | Without data                 | IgG: + IgM: -   |
|                    | Patient 3 Allo-HSCT  | IgG: + IgM: -               | IgG: + IgM: - | IgG: + IgM: -                | IgG: + IgM: -   |
|                    | Patient 4 Allo-HSCT  | IgG: + IgM: -               | IgG: + IgM: - | IgG: + IgM: -                | IgG: + IgM: -   |
|                    | Patient 5 Allo-HSCT  | Without data                | Without data  | Without data                 | Without data    |
|                    | Patient 6 Allo-HSCT  | Without data                | Without data  | Without data                 | Without data    |
|                    | Patient 7 Allo-HSCT  | Without data                | IgG: + IgM: - | Without data                 | IgG: + IgM: -   |
|                    | Patient 8 Allo-HSCT  | Without data                | IgG: + IgM: - | Without data                 | IgG: + IgM: -   |
|                    | Patient 9 Allo-HSCT  | Without data                | Without data  | Without data                 | Without data    |
|                    | Patient 10 Allo-HSCT | Without data                | IgG: + IgM: - | Without data                 | IgG: + IgM: -   |
|                    | Patient 11 Allo-HSCT | Without data                | Without data  | Without data                 | Without data    |
|                    | Patient 12 Allo-HSCT | Without data                | Without data  | Without data                 | Without data    |
|                    | Patient 13 Allo-HSCT | Without data                | IgG: + IgM: - | Without data                 | IgG: + IgM: -   |
|                    | Patient 14 Allo-HSCT | Without data                | Without data  | Without data                 | Without data    |
|                    | Patient 15 Allo-HSCT | Without data                | IgG: + IgM: - | Without data                 | IgG: + IgM: -   |
|                    | Patient 16 Allo-HSCT | IgG: + IgM: -               | IgG: + IgM: - | IgG: + IgM: -                | IgG: + IgM: -   |
|                    | Patient 17 Allo-HSCT | Without data                | Without data  | Without data                 | Without data    |
|                    | Patient 18 Allo-HSCT | Without data                | IgG: + IgM: - | Without data                 | IgG: + IgM: -   |
|                    | Patient 19 Allo-HSCT | Without data                | Without data  | Without data                 | Without data    |
|                    | Patient 20 Allo-HSCT | Without data                | IgG: - IgM: - | Without data                 | IgG: + IgM: -   |
|                    | Patient 21 Allo-HSCT | Without data                | Without data  | Without data                 | Without data    |
|                    | Patient 22 Allo-HSCT | IgG: + IgM: -               | IgG: - IgM: - | IgG: + IgM: -                | IgG: - IgM: -   |
|                    | Patient 23 Allo-HSCT | Without data                | Without data  | Without data                 | Without data    |
|                    | Patient 24 Allo-HSCT | Without data                | Without data  | IgG: - IgM: -                | Without data    |
|                    | Patient 25 Allo-HSCT | Without data                | IgG: + IgM: - | Without data                 | IgG: + IgM: -   |
|                    | Patient 26 Allo-HSCT | Without data                | Without data  | Without data                 | Without data    |
|                    | Patient 27 Allo-HSCT | Without data                | IgG: + IgM: - | Without data                 | IgG: Ind IgM: - |
|                    | Patient 28 Allo-HSCT | IgG: + IgM: -               | Without data  | IgG: - IgM: -                | Without data    |
|                    | Patient 29 Allo-HSCT | Without data                | Without data  | Without data                 | Without data    |
|                    | Patient 30 Allo-HSCT | Without data                | IgG: + IgM: - | IgG: + IgM: -                | IgG: + IgM: -   |
|                    | Patient 31 Allo-HSCT | Without data                | Without data  | Without data                 | Without data    |
|                    | Patient 32 Allo-HSCT | Without data                | Without data  | Without data                 | Without data    |
| Autologous (N=8)   | Patient 1 Auto-HSCT  | IgG: - IgM: -               |               | IgG: - IgM: -                |                 |
|                    | Patient 2 Auto-HSCT  | IgG: + IgM: -               |               | IgG: - IgM: -                |                 |
|                    | Patient 3 Auto-HSCT  | IgG: + IgM: -               |               | IgG: + IgM: -                |                 |
|                    | Patient 4 Auto-HSCT  | IgG: + IgM: -               |               | IgG: + IgM: -                |                 |
|                    | Patient 5 Auto-HSCT  | IgG: + IgM: -               |               | IgG: + IgM: -                |                 |

|  |                     |               |               |
|--|---------------------|---------------|---------------|
|  | Patient 6 Auto-HSCT | IgG: + IgM: - | IgG: + IgM: - |
|  | Patient 7 Auto-HSCT | IgG: + IgM: - | IgG: + IgM: - |
|  | Patient 8 Auto-HSCT | Without data  | Without data  |

Ind means an indeterminate result. Patients who received autologous transplantation receive their own stem cells.



**Supplementary Table S2.** Leukocyte counts in blood samples.

| Patient            | Sample ID | Pre/Post transplant | Follow up days | Total of leukocytes (millions) |
|--------------------|-----------|---------------------|----------------|--------------------------------|
| <b>1 allo-HSCT</b> | 1.00      | Pre-transplant      | -5             | 0.8                            |
|                    | 1.03      | Post-transplant     | 21             | 16.2                           |
|                    | 1.04      |                     | 35             | 19.4                           |
|                    | 1.05      |                     | 49             | 12.6                           |
|                    | 1.06      |                     | 68             | 16.5                           |
|                    | 1.07      |                     | 78             | 3.6                            |
|                    | 1.09      |                     | 110            | 2.1                            |
|                    | 1.10      |                     | 138            | 4.0                            |
|                    | 1.12      |                     | 160            | 13.8                           |
|                    | 1.13      |                     | 182            | 5.4                            |
| <b>2 allo-HSCT</b> | 2.00      | Post-transplant     | 24             | 1.2                            |
|                    | 2.01      |                     | 37             | 9.7                            |
|                    | 2.02      |                     | 52             | 6.5                            |
|                    | 2.03      |                     | 68             | 13.5                           |
|                    | 2.04      |                     | 85             | 8.2                            |
|                    | 2.05      |                     | 92             | 3.3                            |
|                    | 2.06      |                     | 106            | 3.2                            |
|                    | 2.09      |                     | 155            | 11.1                           |
|                    | 2.10      |                     | 162            | 8.6                            |
|                    | 2.11      |                     | 187            | 9.7                            |
|                    | 2.13      |                     | 207            | 12.7                           |
|                    | 2.14      |                     | 241            | 2.1                            |
| <b>3 allo-HSCT</b> | 3.00      | Pre-transplant      | -7             | 8.5                            |
|                    | 3.01      | Post-transplant     | 7              | 11.3                           |
|                    | 3.02      |                     | 21             | 8.9                            |
|                    | 3.03      |                     | 30             | 0.7                            |
|                    | 3.04      |                     | 62             | 0.7                            |
|                    | 3.07      |                     | 86             | 1.2                            |
| <b>4 allo-HSCT</b> | 4.00      | Pre-transplant      | -10            | 8.0                            |
|                    | 4.02      | Post-transplant     | 20             | 10.3                           |
|                    | 4.05      |                     | 74             | 7.7                            |
|                    | 4.06      |                     | 81             | 8.2                            |
|                    | 4.07      |                     | 113            | 3.6                            |

|                    |       |                 |     |     |
|--------------------|-------|-----------------|-----|-----|
|                    | 4.09  |                 | 151 | 0.7 |
|                    | 4.10  |                 | 165 | 2.5 |
|                    | 4.11  |                 | 172 | 0.0 |
|                    | 4.12  |                 | 193 | 2.9 |
|                    | 4.13  |                 | 207 | 2.7 |
|                    | 4.15  |                 | 280 | 2.3 |
|                    | 4.16  |                 | 292 | 6.1 |
|                    | 4.17  |                 | 330 | 4.9 |
|                    | 4.18  |                 | 340 | 1.4 |
|                    | 4.19  |                 | 351 | 2.8 |
| <b>5 allo-HSCT</b> | 6.00  | Pre-transplant  | -7  | 4.8 |
|                    | 6.02  | Post-transplant | 22  | 2.4 |
|                    | 6.04  |                 | 48  | 2.9 |
|                    | 6.06  |                 | 80  | 9.0 |
|                    | 6.07  |                 | 94  | 1.4 |
|                    | 6.08  |                 | 104 | 0.0 |
|                    | 6.09  |                 | 132 | 4.6 |
|                    | 6.10  |                 | 143 | 2.0 |
|                    | 6.11  |                 | 157 | 2.0 |
|                    | 6.13  |                 | 212 | 3.1 |
|                    | 6.14  |                 | 233 | 1.1 |
|                    | 6.15  |                 | 259 | 5.1 |
|                    | 6.16  |                 | 294 | 1.0 |
|                    | 6.19  |                 | 350 | 0.9 |
|                    | 6.20  |                 | 364 | 2.8 |
| <b>6 allo-HSCT</b> | 9.00  | Pre-transplant  | -7  | 3.1 |
|                    | 9.02  | Post-transplant | 13  | 4.3 |
|                    | 9.03  |                 | 21  | 5.2 |
|                    | 9.04  |                 | 25  | 7.4 |
|                    | 9.05  |                 | 75  | 7.4 |
|                    | 9.06  |                 | 95  | 1.4 |
|                    | 9.07  |                 | 106 | 2.5 |
|                    | 9.08  |                 | 120 | 7.0 |
| <b>7 allo-HSCT</b> | 10.00 | Pre-transplant  | -8  | 0.2 |
|                    | 10.02 | Post-transplant | 21  | 7.8 |
|                    | 10.03 |                 | 36  | 7.3 |
|                    | 10.04 |                 | 49  | 7.3 |
|                    | 10.05 |                 | 60  | 3.2 |
|                    | 10.06 |                 | 88  | 6.9 |

|                    |       |                 |     |      |
|--------------------|-------|-----------------|-----|------|
|                    | 10.07 |                 | 117 | 2.2  |
|                    | 10.09 |                 | 152 | 3.4  |
|                    | 10.10 |                 | 189 | 4.2  |
|                    | 10.11 |                 | 202 | 0.7  |
|                    | 10.12 |                 | 249 | 3.2  |
|                    | 10.13 |                 | 277 | 2.2  |
|                    | 10.14 |                 | 291 | 2.6  |
|                    | 10.15 |                 | 305 | 2.1  |
|                    | 10.16 |                 | 320 | 2.0  |
|                    | 10.17 |                 | 344 | 3.2  |
| <b>8 allo-HSCT</b> | 12.00 | Pre-transplant  | -12 | 0.6  |
|                    | 12.02 | Post-transplant | 21  | 11.6 |
|                    | 12.03 |                 | 33  | 16.1 |
|                    | 12.04 |                 | 51  | 7.6  |
|                    | 12.05 |                 | 65  | 7.9  |
|                    | 12.06 |                 | 79  | 5.2  |
|                    | 12.07 |                 | 89  | 4.5  |
|                    | 12.08 |                 | 104 | 11.2 |
|                    | 12.09 |                 | 110 | 7.5  |
|                    | 12.10 |                 | 126 | 7.5  |
|                    | 12.11 |                 | 138 | 3.4  |
|                    | 12.12 |                 | 159 | 17.7 |
|                    | 12.13 |                 | 173 | 10.4 |
|                    | 12.15 |                 | 222 | 3.9  |
|                    | 12.16 |                 | 245 | 11.9 |
|                    | 12.17 |                 | 264 | 7.8  |
|                    | 12.18 |                 | 279 | 19.9 |
|                    | 12.19 |                 | 293 | 16.6 |
|                    | 12.20 |                 | 314 | 1.8  |
|                    | 12.21 |                 | 328 | 2.1  |
|                    | 12.22 |                 | 342 | 2.5  |
| <b>9 allo-HSCT</b> | 13.00 | Pre-transplant  | -9  | 1.6  |
|                    | 13.02 | Post-transplant | 19  | 7.6  |
|                    | 13.03 |                 | 32  | 2.7  |
|                    | 13.04 |                 | 53  | 1.5  |
|                    | 13.05 |                 | 68  | 1.8  |
|                    | 13.06 |                 | 74  | 1.8  |
|                    | 13.07 |                 | 95  | 2.0  |
|                    | 13.08 |                 | 111 | 71.6 |

|                     |       |                 |     |      |
|---------------------|-------|-----------------|-----|------|
|                     | 13.09 |                 | 131 | 13.3 |
|                     | 13.10 |                 | 152 | 2.8  |
|                     | 13.11 |                 | 168 | 9.6  |
|                     | 13.12 |                 | 186 | 2.5  |
|                     | 13.13 |                 | 202 | 5.5  |
|                     | 13.14 |                 | 221 | 3.5  |
|                     | 13.15 |                 | 236 | 2.5  |
|                     | 13.16 |                 | 249 | 3.9  |
|                     | 13.17 |                 | 271 | 2.6  |
|                     | 13.18 |                 | 299 | 2.8  |
|                     | 13.19 |                 | 319 | 5.4  |
| <b>10 allo-HSCT</b> | 14.00 | Pre-transplant  | -8  | 0.1  |
|                     | 14.02 | Post-transplant | 21  | 0.1  |
|                     | 14.03 |                 | 31  | 11.4 |
|                     | 14.09 |                 | 115 | 6.3  |
|                     | 14.10 |                 | 136 | 0.4  |
|                     | 14.11 |                 | 150 | 1.0  |
|                     | 14.12 |                 | 168 | 2.2  |
|                     | 14.13 |                 | 192 | 0.1  |
|                     | 14.14 |                 | 206 | 2.8  |
|                     | 14.15 |                 | 220 | 7.5  |
|                     | 14.16 |                 | 235 | 0.1  |
|                     | 14.17 |                 | 248 | 3.0  |
|                     | 14.18 |                 | 270 | 0.1  |
|                     | 14.19 |                 | 291 | 2.1  |
|                     | 14.20 |                 | 327 | 3.9  |
| <b>11 allo-HSCT</b> | 15.01 |                 | 7   | 0.1  |
|                     | 15.02 |                 | 54  | 1.5  |
|                     | 15.03 |                 | 65  | 3.1  |
|                     | 15.05 |                 | 85  | 2.0  |
| <b>12 allo-HSCT</b> | 19.00 | Pre-transplant  | -7  | 5.3  |
|                     | 19.03 | Post-transplant | 35  | 3.5  |
|                     | 19.04 |                 | 48  | 12.3 |
|                     | 19.05 |                 | 61  | 2.3  |
|                     | 19.07 |                 | 75  | 7.3  |
|                     | 19.09 |                 | 121 | 1.4  |
|                     | 19.10 |                 | 138 | 1.1  |
|                     | 19.11 |                 | 152 | 4.8  |
|                     | 19.12 |                 | 173 | 2.3  |

|                     |       |                 |     |      |
|---------------------|-------|-----------------|-----|------|
|                     | 19.13 |                 | 187 | 2.4  |
|                     | 19.14 |                 | 201 | 2.5  |
|                     | 19.15 |                 | 236 | 3.6  |
| <b>13 allo-HSCT</b> | 20.00 | Pre-transplant  | -8  | 0.8  |
|                     | 20.03 | Post-transplant | 21  | 3.3  |
|                     | 20.05 |                 | 55  | 1.2  |
|                     | 20.06 |                 | 66  | 6.9  |
|                     | 20.07 |                 | 76  | 2.3  |
| <b>14 allo-HSCT</b> | 22.00 | Pre-transplant  | -8  | 0.4  |
|                     | 22.01 | Post-transplant | 7   | 4.8  |
|                     | 22.02 |                 | 26  | 9.1  |
|                     | 22.03 |                 | 40  | 36.0 |
|                     | 22.04 |                 | 46  | 1.7  |
|                     | 22.06 |                 | 78  | 0.8  |
|                     | 22.08 |                 | 102 | 4.1  |
|                     | 22.09 |                 | 116 | 8.4  |
|                     | 22.10 |                 | 130 | 5.9  |
|                     | 22.11 |                 | 158 | 2.6  |
|                     | 22.12 |                 | 172 | 44.8 |
|                     | 22.13 |                 | 200 | 6.0  |
|                     | 22.14 |                 | 215 | 0.9  |
|                     | 22.15 |                 | 228 | 4.2  |
|                     | 22.16 |                 | 252 | 21.8 |
| <b>15 allo-HSCT</b> | 23.00 | Pre-transplant  | -7  | 1.2  |
|                     | 23.01 | Post-transplant | 0   | 19.1 |
|                     | 23.03 |                 | 21  | 17.2 |
|                     | 23.04 |                 | 38  | 5.0  |
|                     | 23.05 |                 | 56  | 1.8  |
| <b>16 allo-HSCT</b> | 24.00 | Pre-transplant  | -6  | 1.8  |
|                     | 24.01 | Post-transplant | 7   | 31.7 |
|                     | 24.02 |                 | 21  | 3.1  |
|                     | 24.03 |                 | 36  | 0.5  |
|                     | 24.04 |                 | 50  | 20.1 |
|                     | 24.05 |                 | 61  | 1.5  |
|                     | 24.06 |                 | 75  | 1.7  |
|                     | 24.07 |                 | 88  | 1.9  |
|                     | 24.08 |                 | 102 | 5.9  |
| <b>17 allo-HSCT</b> | 25.00 | Pre-transplant  | -8  | 0.8  |
|                     | 25.02 | Post-transplant | 21  | 6.6  |



|                     |       |                 |     |      |
|---------------------|-------|-----------------|-----|------|
|                     | 25.03 |                 | 33  | 0.8  |
|                     | 25.04 |                 | 46  | 2.1  |
|                     | 25.05 |                 | 61  | 2.6  |
|                     | 25.06 |                 | 75  | 4.0  |
|                     | 25.07 |                 | 95  | 12.6 |
|                     | 25.08 |                 | 116 | 5.8  |
|                     | 25.09 |                 | 131 | 4.2  |
|                     | 25.10 |                 | 151 | 13.1 |
|                     | 25.11 |                 | 183 | 5.1  |
|                     | 25.12 |                 | 201 | 6.1  |
|                     | 25.13 |                 | 214 | 3.8  |
|                     | 25.14 |                 | 228 | 10.8 |
|                     | 25.15 |                 | 242 | 5.1  |
|                     | 25.16 |                 | 257 | 4.4  |
|                     | 25.17 |                 | 271 | 7.0  |
|                     | 25.18 |                 | 284 | 2.4  |
|                     | 25.19 |                 | 299 | 3.1  |
|                     | 25.20 |                 | 319 | 4.5  |
|                     | 25.21 |                 | 334 | 4.4  |
| <b>18 allo-HSCT</b> | 26.00 | Post-transplant | 2   | 0.8  |
|                     | 26.02 |                 | 30  | 4.0  |
|                     | 26.03 |                 | 44  | 6.8  |
|                     | 26.04 |                 | 62  | 1.9  |
|                     | 26.05 |                 | 83  | 0.5  |
|                     | 26.06 |                 | 96  | 2.9  |
|                     | 26.07 |                 | 112 | 2.2  |
|                     | 26.08 |                 | 132 | 5.4  |
|                     | 26.09 |                 | 153 | 2.1  |
|                     | 26.10 |                 | 170 | 3.5  |
|                     | 26.11 |                 | 188 | 3.0  |
|                     | 26.12 |                 | 202 | 0.8  |
|                     | 26.13 |                 | 215 | 0.1  |
| <b>19 allo-HSCT</b> | 27.00 | Pre-transplant  | -7  | 5.8  |
|                     | 27.01 | Post-transplant | 11  | 0.4  |
|                     | 27.02 |                 | 29  | 12.3 |
|                     | 27.03 |                 | 41  | 6.4  |
|                     | 27.04 |                 | 53  | 5.6  |
|                     | 27.05 |                 | 67  | 3.7  |
|                     | 27.06 |                 | 88  | 8.4  |

|                     |       |                 |     |      |
|---------------------|-------|-----------------|-----|------|
| <b>20 allo-HSCT</b> | 28.00 | Pre-transplant  | -7  | 6.4  |
|                     | 28.03 | Post-transplant | 48  | 40.0 |
|                     | 28.04 |                 | 63  | 4.3  |
| <b>21 allo-HSCT</b> | 29.00 |                 | 17  | 2.4  |
|                     | 29.02 |                 | 21  | 5.6  |
|                     | 29.03 |                 | 34  | 5.0  |
|                     | 29.04 |                 | 48  | 0.6  |
|                     | 29.05 |                 | 62  | 4.2  |
|                     | 29.06 |                 | 76  | 13.4 |
|                     | 29.07 |                 | 89  | 2.7  |
|                     | 29.08 |                 | 104 | 1.3  |
|                     | 29.09 |                 | 119 | 4.6  |
|                     | 29.10 |                 | 132 | 2.7  |
|                     | 29.11 |                 | 160 | 1.4  |
|                     | 29.12 |                 | 174 | 3.7  |
|                     | 29.13 |                 | 188 | 2.5  |
|                     | 29.14 |                 | 202 | 2.5  |
|                     | 29.15 |                 | 216 | 1.6  |
|                     | 29.16 |                 | 230 | 3.4  |
|                     | 29.17 |                 | 251 | 6.4  |
|                     | 29.18 |                 | 272 | 3.6  |
|                     | 29.19 |                 | 309 | 5.5  |
|                     | 29.20 |                 | 351 | 3.5  |
| <b>22 allo-HSCT</b> | 30.00 | Pre-transplant  | -7  | 0.5  |
|                     | 30.01 | Post-transplant | 7   | 8.7  |
|                     | 30.02 |                 | 21  | 11.8 |
|                     | 30.03 |                 | 47  | 4.1  |
|                     | 30.04 |                 | 61  | 3.2  |
|                     | 30.05 |                 | 75  | 1.3  |
|                     | 30.06 |                 | 90  | 6.8  |
|                     | 30.07 |                 | 124 | 3.4  |
|                     | 30.08 |                 | 133 | 3.4  |
|                     | 30.09 |                 | 166 | 1.6  |
|                     | 30.10 |                 | 180 | 1.7  |
|                     | 30.11 |                 | 201 | 0.9  |
|                     | 30.12 |                 | 236 | 3.2  |
|                     | 30.13 |                 | 250 | 5.1  |
|                     | 30.14 |                 | 272 | 5.5  |
|                     | 30.15 |                 | 293 | 2.0  |

|                     |       |                 |     |      |
|---------------------|-------|-----------------|-----|------|
| <b>23 allo-HSCT</b> | 31.00 | Pre-transplant  | -2  | 0.2  |
|                     | 31.01 | Post-transplant | 14  | 2.2  |
|                     | 31.02 |                 | 21  | 11.5 |
|                     | 31.03 |                 | 35  | 4.7  |
|                     | 31.04 |                 | 54  | 8.1  |
| <b>24 allo-HSCT</b> | 33.00 | Pre-transplant  | -9  | 3.0  |
|                     | 33.02 | Post-transplant | 21  | 9.7  |
|                     | 33.03 |                 | 33  | 0.2  |
|                     | 33.04 |                 | 47  | 0.5  |
|                     | 33.05 |                 | 68  | 2.9  |
|                     | 33.06 |                 | 89  | 2.9  |
| <b>25 allo-HSCT</b> | 34.00 | Pre-transplant  | -8  | 3.1  |
|                     | 34.02 | Post-transplant | 20  | 4.3  |
|                     | 34.03 |                 | 36  | 3.5  |
|                     | 34.04 |                 | 55  | 2.6  |
|                     | 34.05 |                 | 69  | 2.0  |
|                     | 34.06 |                 | 97  | 0.4  |
|                     | 34.07 |                 | 112 | 1.2  |
|                     | 34.08 |                 | 126 | 0.6  |
|                     | 34.09 |                 | 146 | 0.5  |
|                     | 34.10 |                 | 160 | 0.2  |
|                     | 34.11 |                 | 191 | 2.7  |
|                     | 34.12 |                 | 209 | 1.9  |
|                     | 34.13 |                 | 223 | 1.2  |
|                     | 34.14 |                 | 251 | 1.8  |
|                     | 34.15 |                 | 322 | 1.5  |
|                     | 34.16 |                 | 339 | 2.3  |
| <b>26 allo-HSCT</b> | 37.00 | Post-transplant | 6   | 1.4  |
|                     | 37.02 |                 | 27  | 0.8  |
|                     | 37.03 |                 | 46  | 1.1  |
|                     | 37.04 |                 | 60  | 0.5  |
|                     | 37.05 |                 | 82  | 0.3  |
|                     | 37.07 |                 | 117 | 1.1  |
|                     | 37.08 |                 | 131 | 2.0  |
|                     | 37.09 |                 | 145 | 0.5  |
|                     | 37.10 |                 | 159 | 3.3  |
|                     | 37.11 |                 | 174 | 1.6  |
|                     | 37.12 |                 | 187 | 5.3  |
|                     | 37.13 |                 | 202 | 3.7  |

|                     |       |                 |     |      |
|---------------------|-------|-----------------|-----|------|
|                     | 37.14 |                 | 215 | 0.7  |
|                     | 37.15 |                 | 231 | 3.1  |
|                     | 37.16 |                 | 287 | 0.6  |
| <b>27 allo-HSCT</b> | 40.00 | Pre-transplant  | -7  | 5.5  |
|                     | 40.03 | Post-transplant | 35  | 4.6  |
|                     | 40.04 |                 | 49  | 1.1  |
|                     | 40.05 |                 | 63  | 2.6  |
|                     | 40.06 |                 | 77  | 0.4  |
|                     | 40.07 |                 | 91  | 3.4  |
|                     | 40.08 |                 | 104 | 2.0  |
|                     | 40.09 |                 | 125 | 2.3  |
|                     | 40.10 |                 | 181 | 1.3  |
|                     | 40.11 |                 | 259 | 3.3  |
|                     | 40.12 |                 | 293 | 6.0  |
|                     | 40.13 |                 | 307 | 5.4  |
|                     | 40.14 |                 | 323 | 1.9  |
|                     | 40.15 |                 | 359 | 3.3  |
| <b>28 allo-HSCT</b> | 41.00 | Pre-transplant  | -7  | 3.5  |
|                     | 41.01 | Post-transplant | 4   | 0.3  |
|                     | 41.02 |                 | 20  | 2.6  |
|                     | 41.03 |                 | 40  | 5.6  |
|                     | 41.04 |                 | 52  | 1.3  |
|                     | 41.05 |                 | 68  | 3.3  |
|                     | 41.06 |                 | 81  | 1.8  |
|                     | 41.07 |                 | 95  | 1.4  |
|                     | 41.08 |                 | 109 | 1.1  |
|                     | 41.09 |                 | 171 | 3.6  |
|                     | 41.10 |                 | 199 | 4.7  |
|                     | 41.11 |                 | 227 | 3.8  |
|                     | 41.12 |                 | 245 | 4.4  |
|                     | 41.13 |                 | 292 | 7.0  |
|                     | 41.14 |                 | 319 | 6.5  |
|                     | 41.15 |                 | 332 | 4.3  |
|                     | 41.16 |                 | 341 | 3.1  |
|                     | 41.17 |                 | 363 | 16.1 |
| <b>29 allo-HSCT</b> | 42.00 | Pre-transplant  | -9  | 0.9  |
|                     | 42.02 | Post-transplant | 21  | 0.8  |
|                     | 42.03 |                 | 34  | 2.9  |
|                     | 42.04 |                 | 55  | 2.8  |

|                     |       |                 |     |      |
|---------------------|-------|-----------------|-----|------|
|                     | 42.05 |                 | 69  | 3.7  |
| <b>30 allo-HSCT</b> | 44.00 | Pre-transplant  | -7  | 5.5  |
|                     | 44.02 | Post-transplant | 25  | 1.7  |
|                     | 44.03 |                 | 35  | 1.8  |
|                     | 44.04 |                 | 80  | 2.1  |
|                     | 44.05 |                 | 101 | 3.8  |
|                     | 44.06 |                 | 136 | 2.6  |
|                     | 44.07 |                 | 171 | 7.5  |
|                     | 44.08 |                 | 185 | 2.4  |
|                     | 44.09 |                 | 199 | 4.2  |
|                     | 44.10 |                 | 227 | 9.4  |
|                     | 44.11 |                 | 238 | 5.0  |
| <b>31 allo-HSCT</b> | 45.00 |                 | 0   | 3.3  |
|                     | 45.02 |                 | 21  | 1.5  |
|                     | 45.03 |                 | 35  | 0.2  |
|                     | 45.04 |                 | 50  | 15.6 |
|                     | 45.05 |                 | 61  | 15.0 |
|                     | 45.06 |                 | 75  | 6.8  |
|                     | 45.07 |                 | 85  | 1.5  |
|                     | 45.08 |                 | 111 | 1.0  |
|                     | 45.09 |                 | 132 | 2.3  |
|                     | 45.10 |                 | 146 | 7.4  |
|                     | 45.11 |                 | 169 | 0.8  |
|                     | 45.12 |                 | 180 | 0.5  |
|                     | 45.13 |                 | 202 | 1.2  |
|                     | 45.14 |                 | 211 | 2.3  |
| <b>32 allo-HSCT</b> | 46.00 | Pre-transplant  | -4  | 0.5  |
|                     | 46.01 | Post-transplant | 7   | 0.5  |
|                     | 46.02 |                 | 22  | 2.4  |
|                     | 46.03 |                 | 34  | 1.8  |
|                     | 46.04 |                 | 48  | 0.8  |
|                     | 46.05 |                 | 63  | 4.0  |
|                     | 46.06 |                 | 97  | 8.7  |
|                     | 46.07 |                 | 111 | 4.2  |
|                     | 46.08 |                 | 125 | 1.6  |
|                     | 46.09 |                 | 134 | 0.1  |
|                     | 46.10 |                 | 152 | 6.7  |
| <b>1 auto-HSCT</b>  | 5.00  | Pre-transplant  | -8  | 5.4  |
|                     | 5.01  | Post-transplant | 1   | 1.3  |

|                    |       |                 |     |      |
|--------------------|-------|-----------------|-----|------|
|                    | 5.03  |                 | 21  | 7.5  |
|                    | 5.04  |                 | 56  | 5.7  |
| <b>2 auto-HSCT</b> | 7.00  | Pre-transplant  | -7  | 6.7  |
|                    | 7.02  | Post-transplant | 19  | 6.7  |
|                    | 7.03  |                 | 24  | 1.2  |
| <b>3 auto-HSCT</b> | 8.00  | Pre-transplant  | -7  | 4.3  |
|                    | 8.03  | Post-transplant | 11  | 0.8  |
|                    | 8.04  |                 | 31  | 16.3 |
|                    | 8.05  |                 | 87  | 4.9  |
| <b>4 auto-HSCT</b> | 17.00 | Pre-transplant  | -7  | 1.6  |
|                    | 17.02 | Post-transplant | 22  | 9.5  |
| <b>5 auto-HSCT</b> | 32.00 | Pre-transplant  | -7  | 1.0  |
|                    | 32.01 | Post-transplant | 15  | 0.8  |
|                    | 32.02 |                 | 21  | 1.8  |
|                    | 32.03 |                 | 41  | 0.6  |
|                    | 32.04 |                 | 57  | 8.7  |
|                    | 32.05 |                 | 170 | 12.9 |
| <b>6 auto-HSCT</b> | 35.00 | Pre-transplant  | -7  | 6.0  |
|                    | 35.01 | Post-transplant | 4   | 1.1  |
|                    | 35.02 |                 | 21  | 2.4  |
|                    | 35.03 |                 | 32  | 2.4  |
|                    | 35.04 |                 | 60  | 7.6  |
| <b>7 auto-HSCT</b> | 38.00 | Pre-transplant  | -7  | 0.6  |
|                    | 38.01 | Post-transplant | 7   | 5.5  |
|                    | 38.02 |                 | 41  | 5.5  |
| <b>8 auto-HSCT</b> | 43.00 | Pre-transplant  | -7  | 1.7  |
|                    | 43.01 | Post-transplant | 7   | 1.8  |
|                    | 43.02 |                 | 21  | 2.5  |
